# Supplementary material for: Quantum-Chemical Consideration of Al2M2 Tetranuclear Metal Clusters (M–3d-Element): Molecular/Electronic Structures and Thermodynamics
Source: MDPI journal article supplement (doi:10.3390/ma14226836), 2021-11-12
Supplement: s1 [file s1]

*Supplementary Materials*

# Quantum-Chemical Consideration of $\text{Al}_2\text{M}_2$ Tetranuclear Metal Clusters (M–3d-Element): Molecular/Electronic Structures and Thermodynamics

Oleg V. Mikhailov <sup>1,\*</sup> and Denis V. Chachkov <sup>2</sup>

<sup>1</sup> Department of Analytical Chemistry, Certification and Quality Management, Kazan National Research Technological University, K. Marx Street 68, 420015 Kazan, Russia

<sup>2</sup> Kazan Department of Joint Supercomputer Center of Russian Academy of Sciences — Branch of Federal Scientific Center “Scientific Research Institute for System Analysis of the RAS”, Lobachevskii Street 2/31, 420111 Kazan, Russia; de2005c@gmail.com

\* Correspondence: olegmkhly@gmail.com

**Citation:** Mikhailov, O.V.; Chachkov, D.V. Quantum-Chemical Consideration of  $\text{Al}_2\text{M}_2$  Tetranuclear Metal Clusters (M–3d-Element): Molecular/Electronic Structures and Thermodynamics. *Materials* **2021**, *14*, 6836. <https://doi.org/10.3390/ma14226836>

Academic Editors: Yong-Cheng Lin, Zhe Zhang, Xin-Yun Wang and Guo-Qun Zhao

Received: 30 September 2021

Accepted: 10 November 2021

Published:

**Publisher’s Note:** MDPI stays neutral with regard to jurisdictional claims in published maps and institutional affiliations.

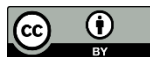

**Copyright:** © 2021 by the authors. Licensee MDPI, Basel, Switzerland. This article is an open access article distributed under the terms and conditions of the Creative Commons Attribution (CC BY) license (<http://creativecommons.org/licenses/by/4.0/>).

$\text{Al}_2\text{Sc}_2$  clusters having ground state with  $M_s = 1$

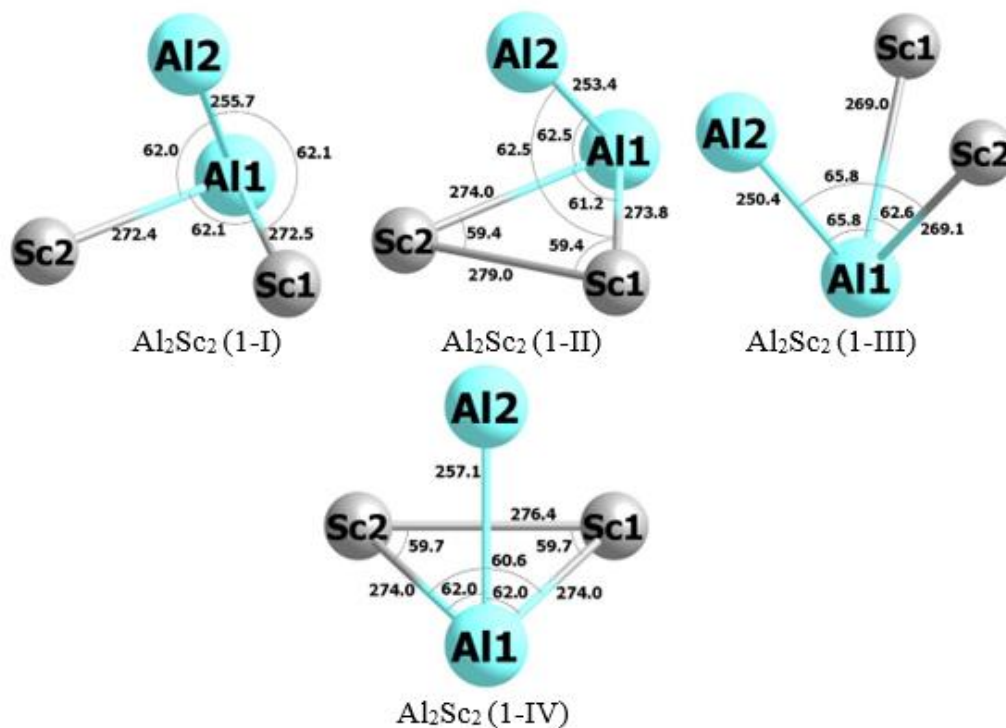

$\text{Al}_2\text{Sc}_2$  clusters having ground state with  $M_s = 3$

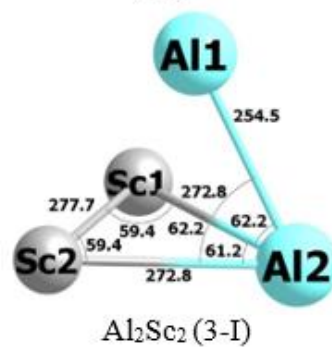

$\text{Al}_2\text{Sc}_2$  clusters having ground state with  $M_s = 5$

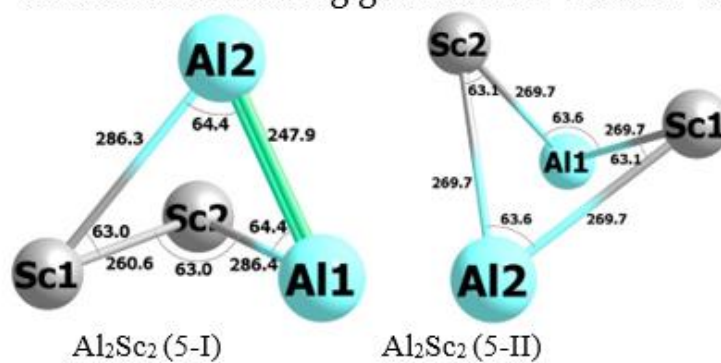

Figure S1. Molecular structures of  $\text{Al}_2\text{Sc}_2$  metal clusters.

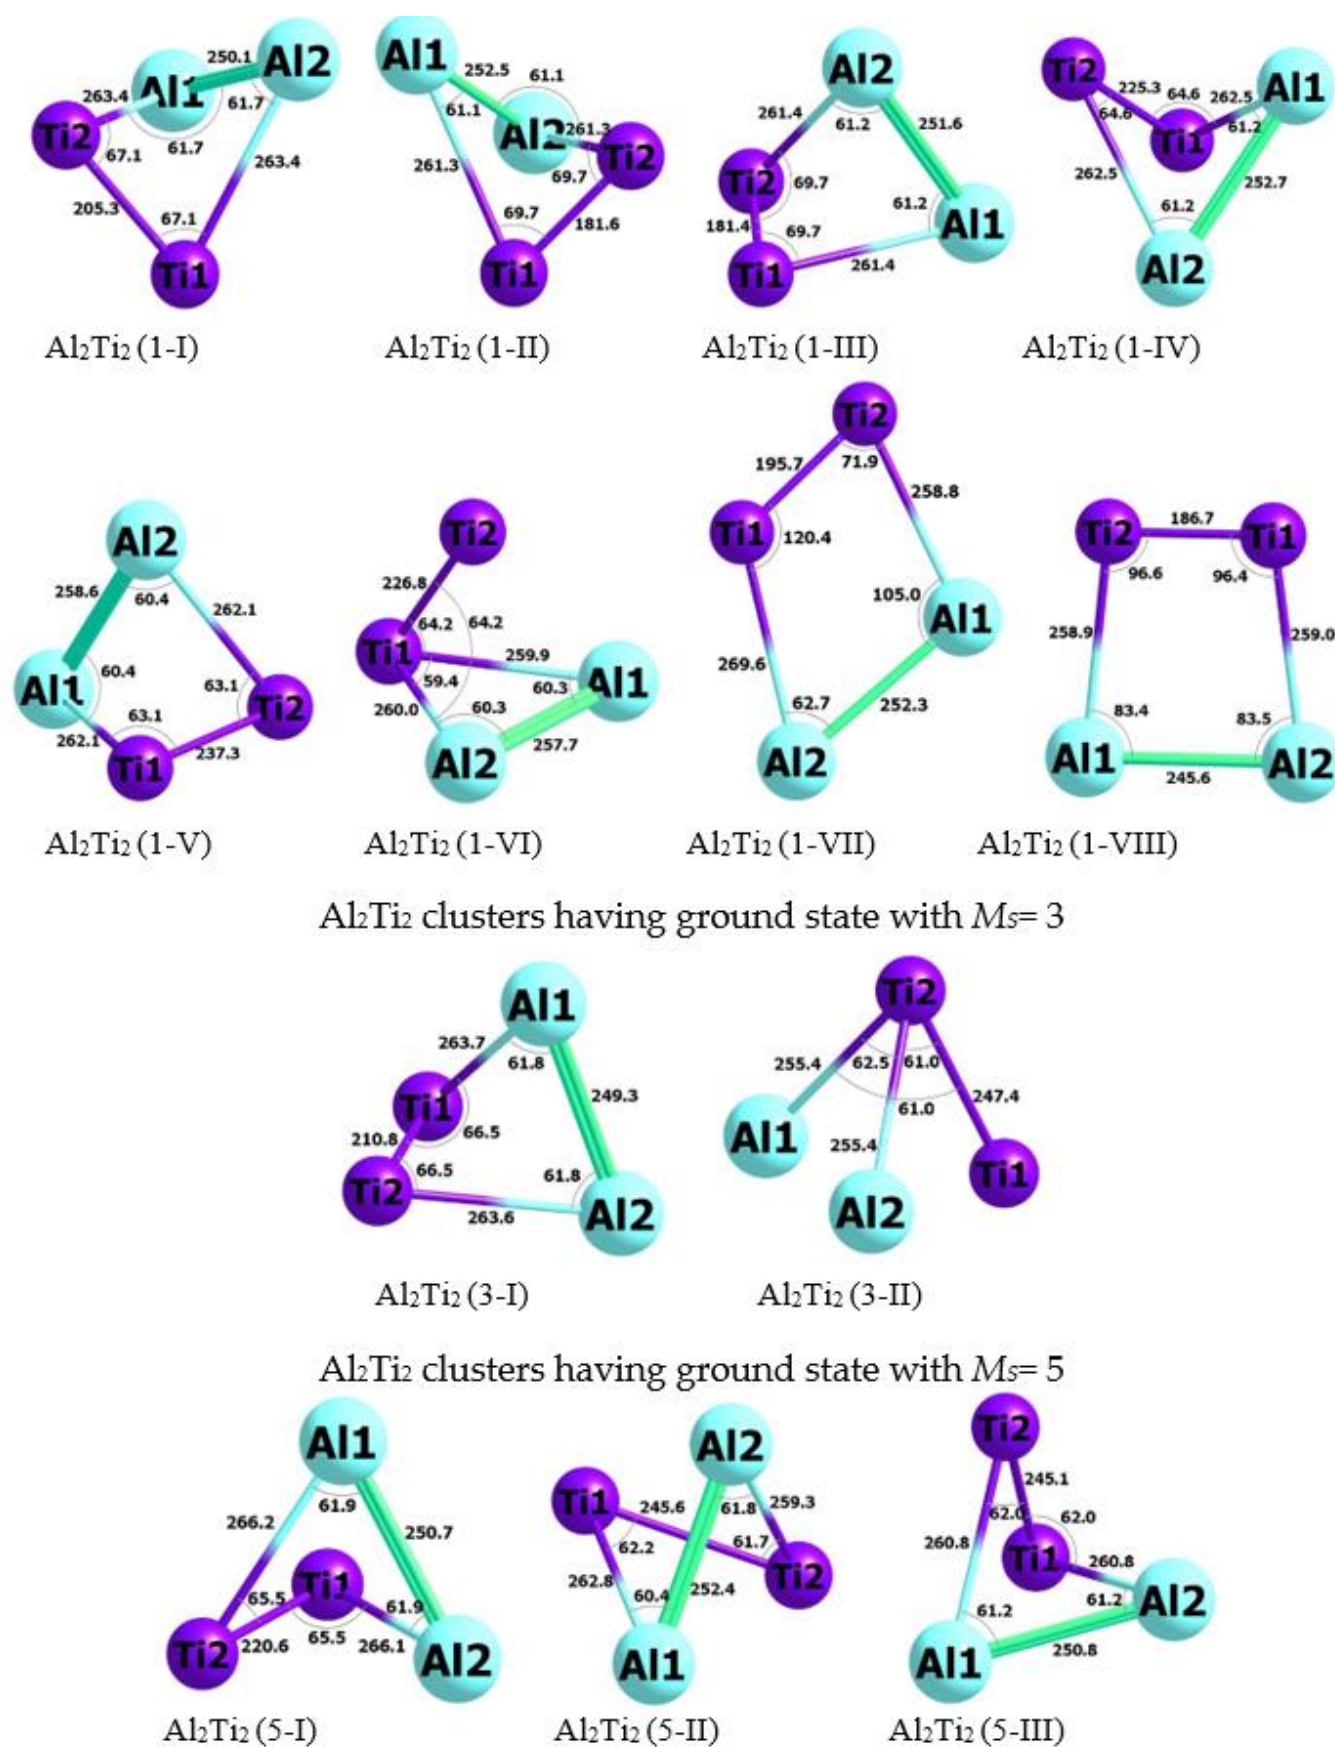Figure S2. Molecular structures of Al<sub>2</sub>Ti<sub>2</sub> metal clusters.

### Al<sub>2</sub>V<sub>2</sub> clusters having ground state with $M_s = 1$

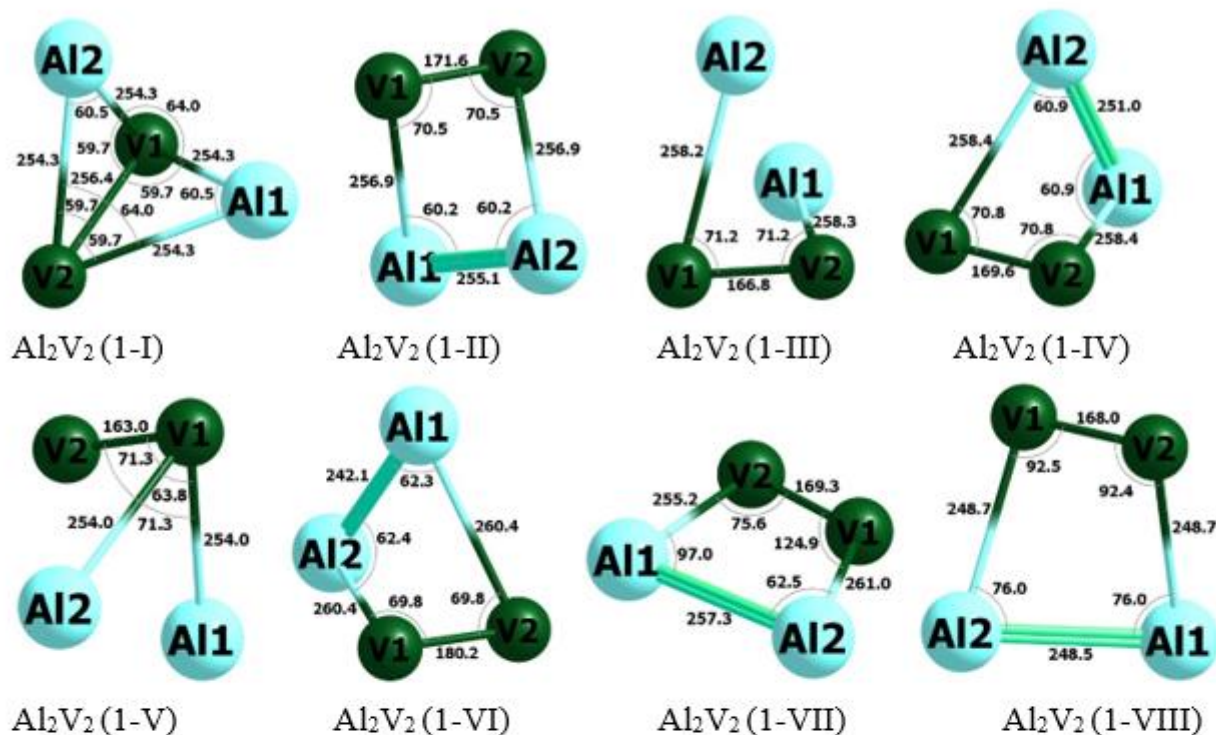

### Al<sub>2</sub>V<sub>2</sub> clusters having ground state with $M_s = 3$

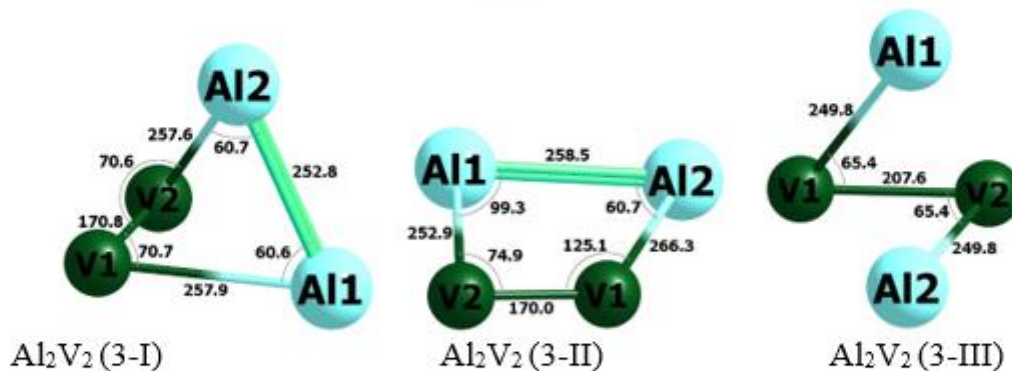

### Al<sub>2</sub>V<sub>2</sub> clusters having ground state with $M_s = 5$

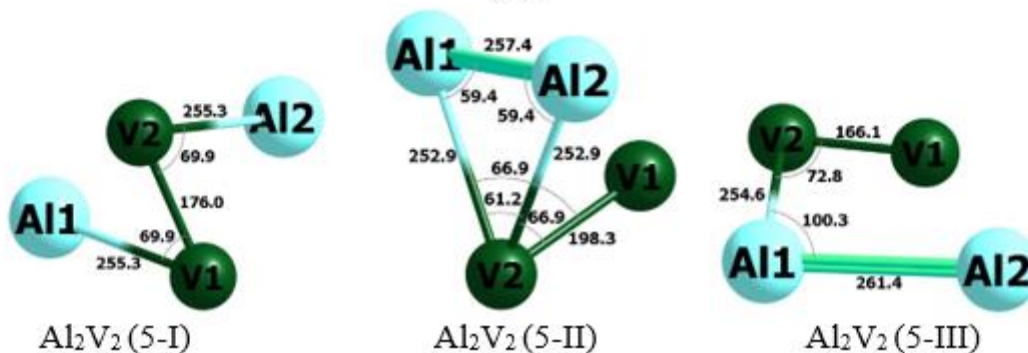

Figure S3. Molecular structures of Al<sub>2</sub>V<sub>2</sub> metal clusters.



$\text{Al}_2\text{Cr}_2$  clusters having ground state with  $M_s=1$

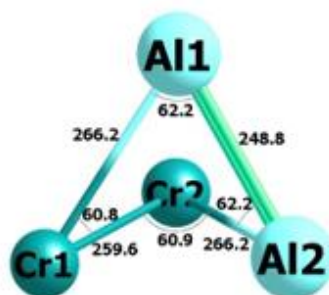

$\text{Al}_2\text{Cr}_2$  (1-I)

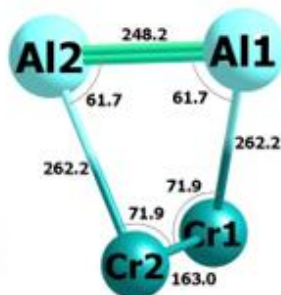

$\text{Al}_2\text{Cr}_2$  (1-II)

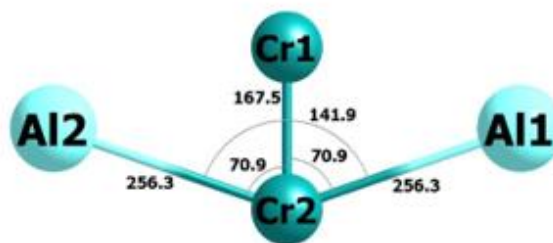

$\text{Al}_2\text{Cr}_2$  (1-III)

$\text{Al}_2\text{Cr}_2$  clusters having ground state with  $M_s=3$

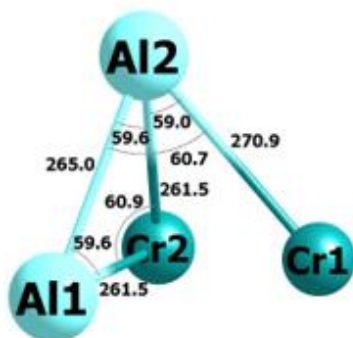

$\text{Al}_2\text{Cr}_2$  (3-I)

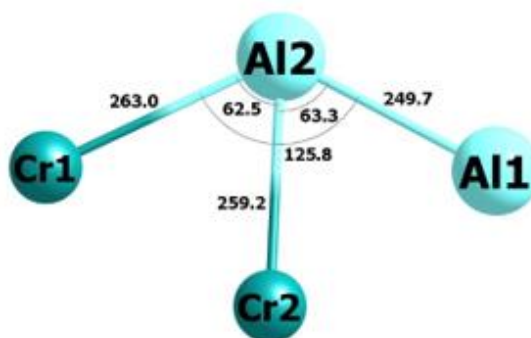

$\text{Al}_2\text{Cr}_2$  (3-II)

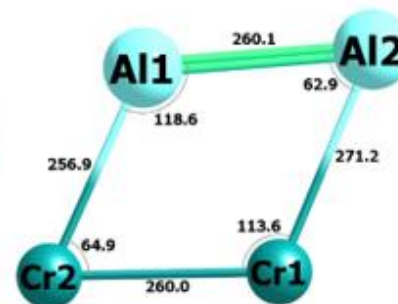

$\text{Al}_2\text{Cr}_2$  (3-III)

$\text{Al}_2\text{Cr}_2$  clusters having ground state with  $M_s=5$

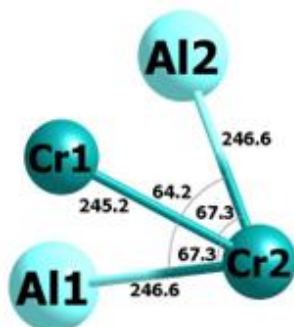

$\text{Al}_2\text{Cr}_2$  (5-I)

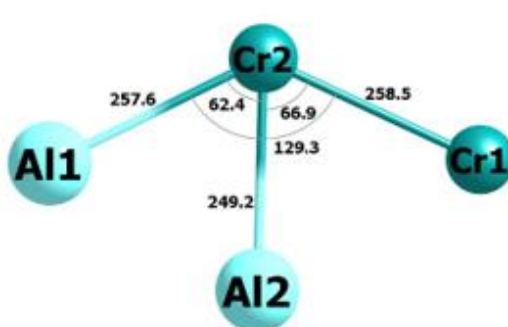

$\text{Al}_2\text{Cr}_2$  (5-II)

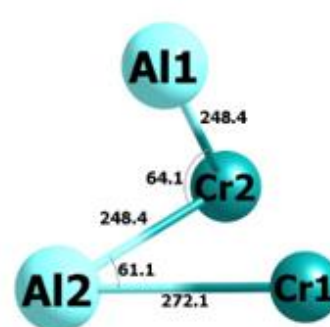

$\text{Al}_2\text{Cr}_2$  (5-III)

Figure S4. Molecular structures of  $\text{Al}_2\text{Cr}_2$  metal clusters.

### Al<sub>2</sub>Mn<sub>2</sub> clusters having ground state with $M_S = 1$

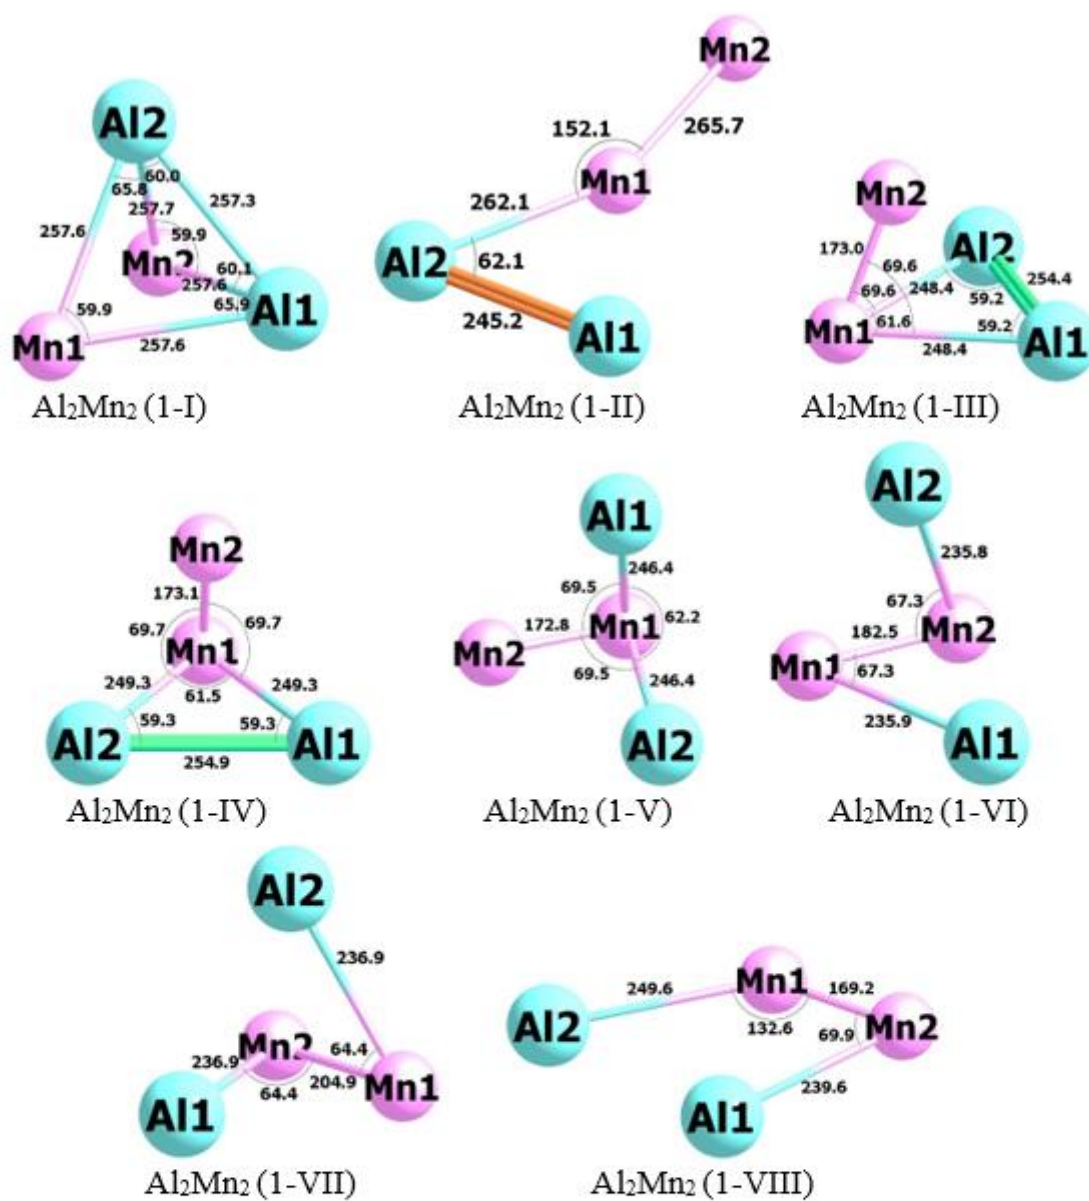

### Al<sub>2</sub>Mn<sub>2</sub> clusters having ground state with $M_S = 3$

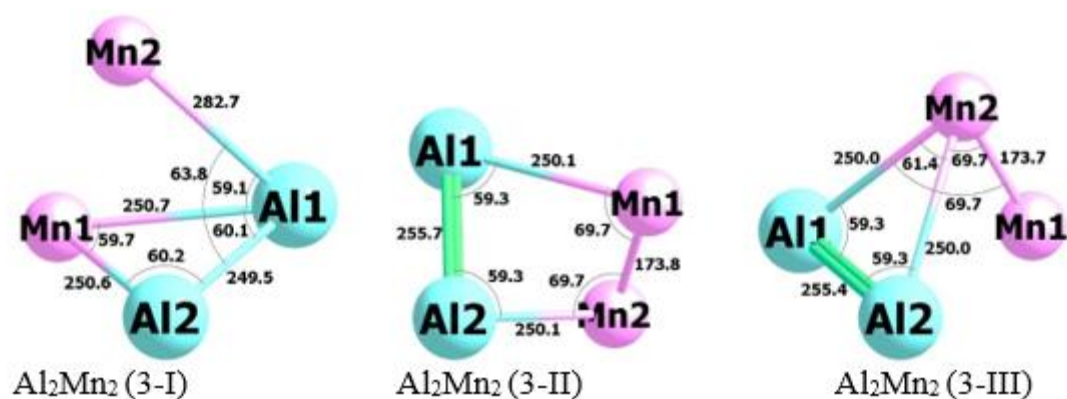

$\text{Al}_2\text{Mn}_2$  clusters having ground state with  $M_S = 5$

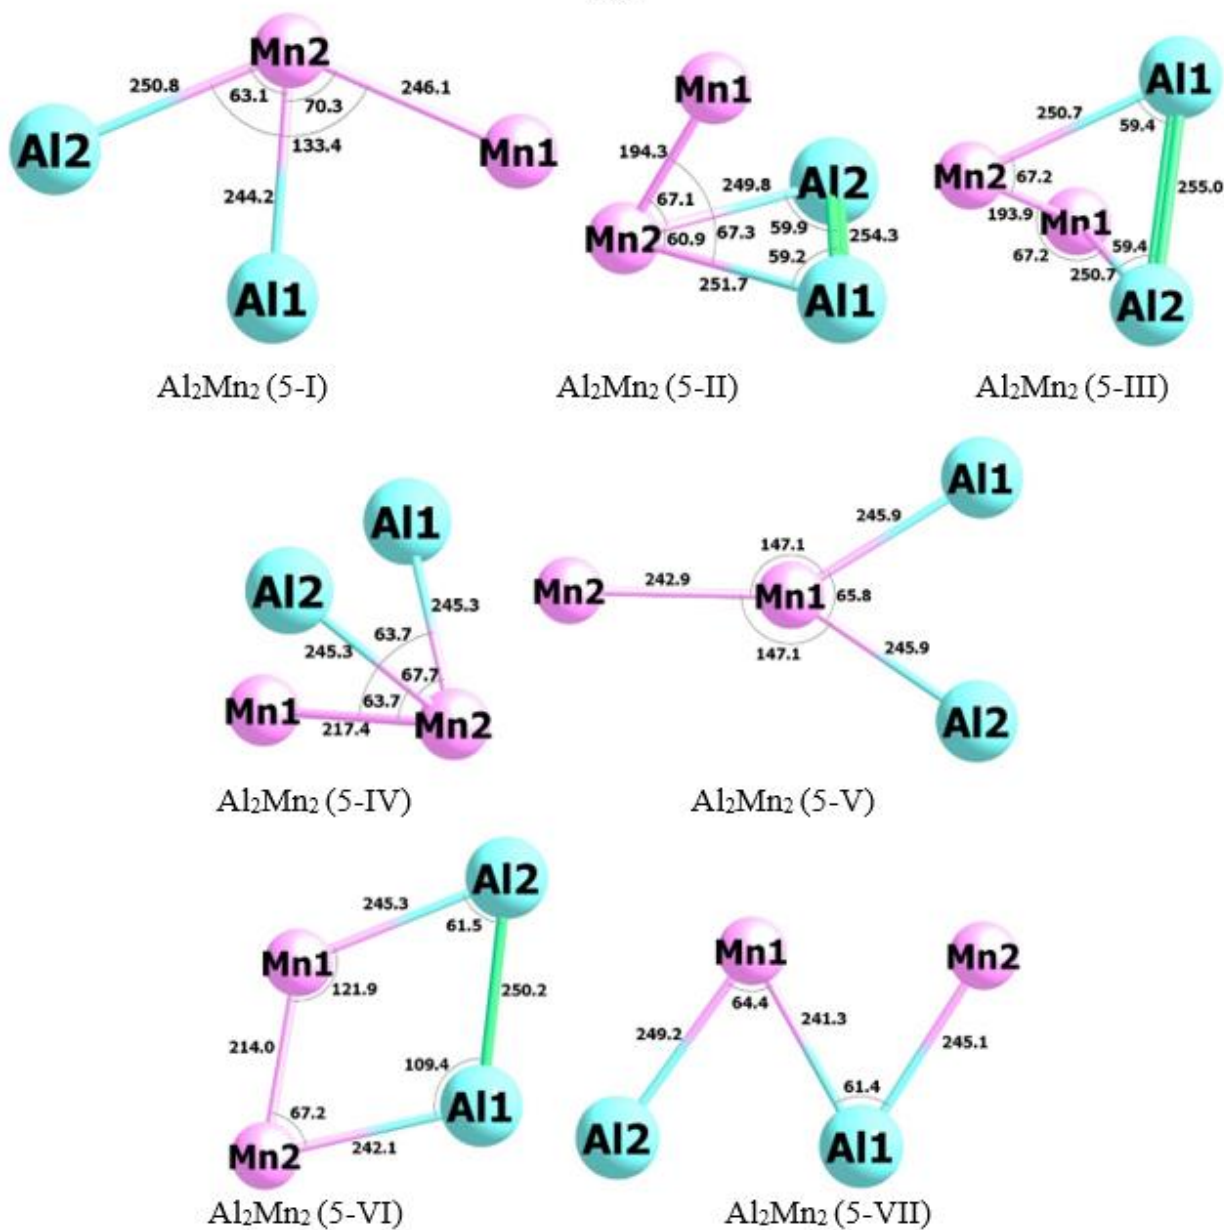

$\text{Al}_2\text{Mn}_2$  clusters having ground state with  $M_S = 7$

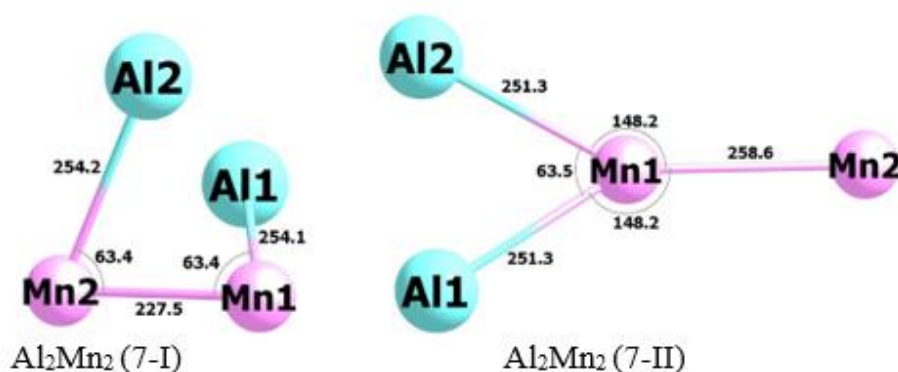

Figure S5. Molecular structures of  $\text{Al}_2\text{Mn}_2$  metal clusters.



### Al<sub>2</sub>Fe<sub>2</sub> clusters having ground state with $M_s = 1$

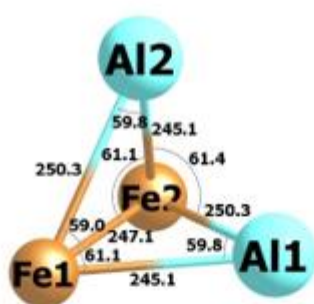Al<sub>2</sub>Fe<sub>2</sub> (1-I)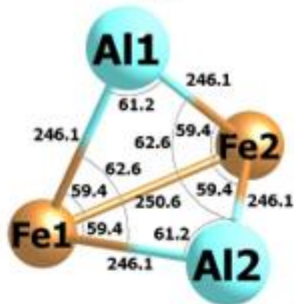Al<sub>2</sub>Fe<sub>2</sub> (1-II)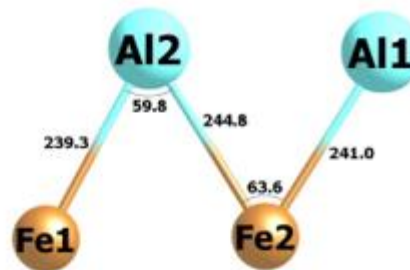Al<sub>2</sub>Fe<sub>2</sub> (1-III)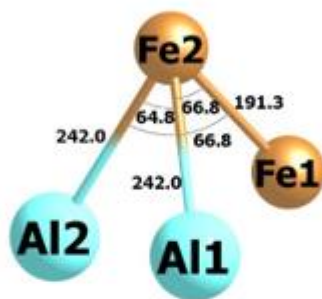Al<sub>2</sub>Fe<sub>2</sub> (1-IV)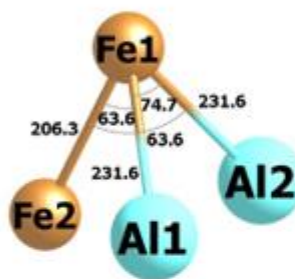Al<sub>2</sub>Fe<sub>2</sub> (1-V)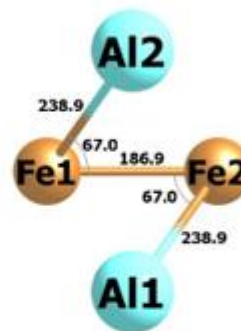Al<sub>2</sub>Fe<sub>2</sub> (1-VI)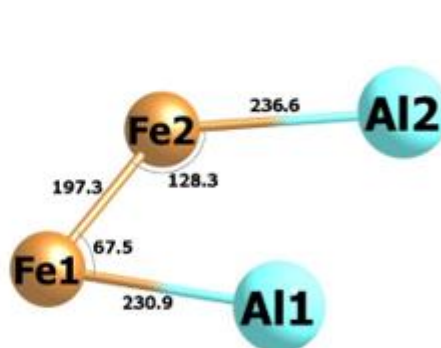Al<sub>2</sub>Fe<sub>2</sub> (1-VII)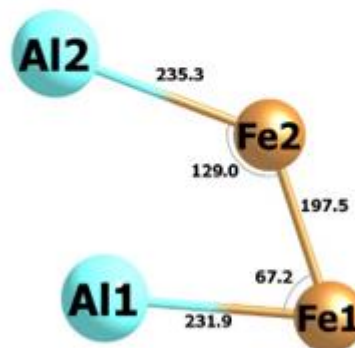Al<sub>2</sub>Fe<sub>2</sub> (1-VIII)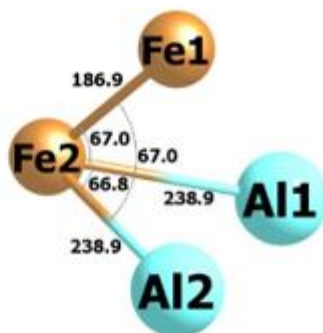Al<sub>2</sub>Fe<sub>2</sub> (1-IX)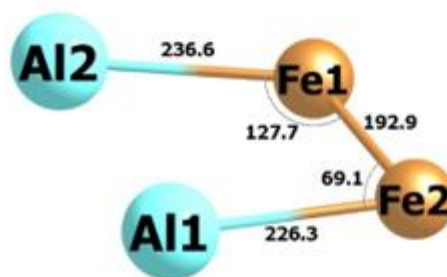Al<sub>2</sub>Fe<sub>2</sub> (1-X)



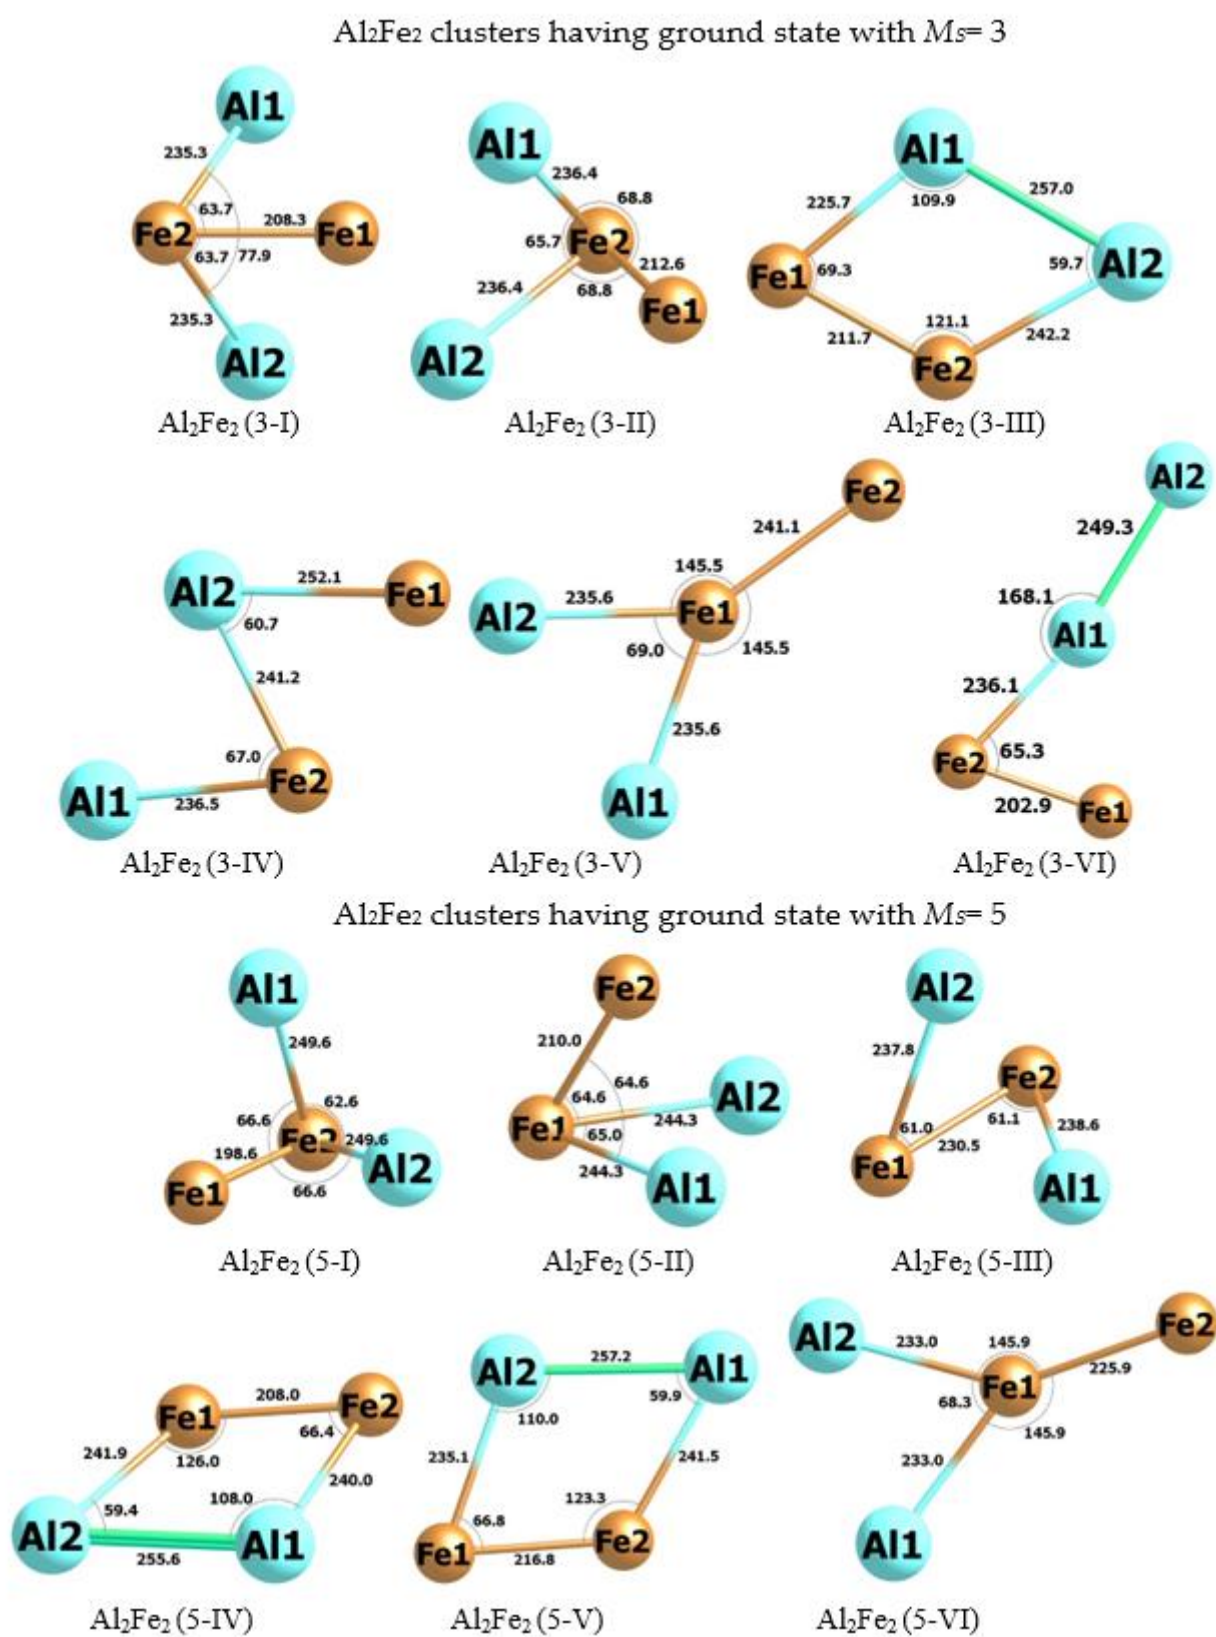Figure S6. Molecular structures of Al<sub>2</sub>Fe<sub>2</sub> metal clusters.

$\text{Al}_2\text{Co}_2$  clusters having ground state with  $M_S = 1$

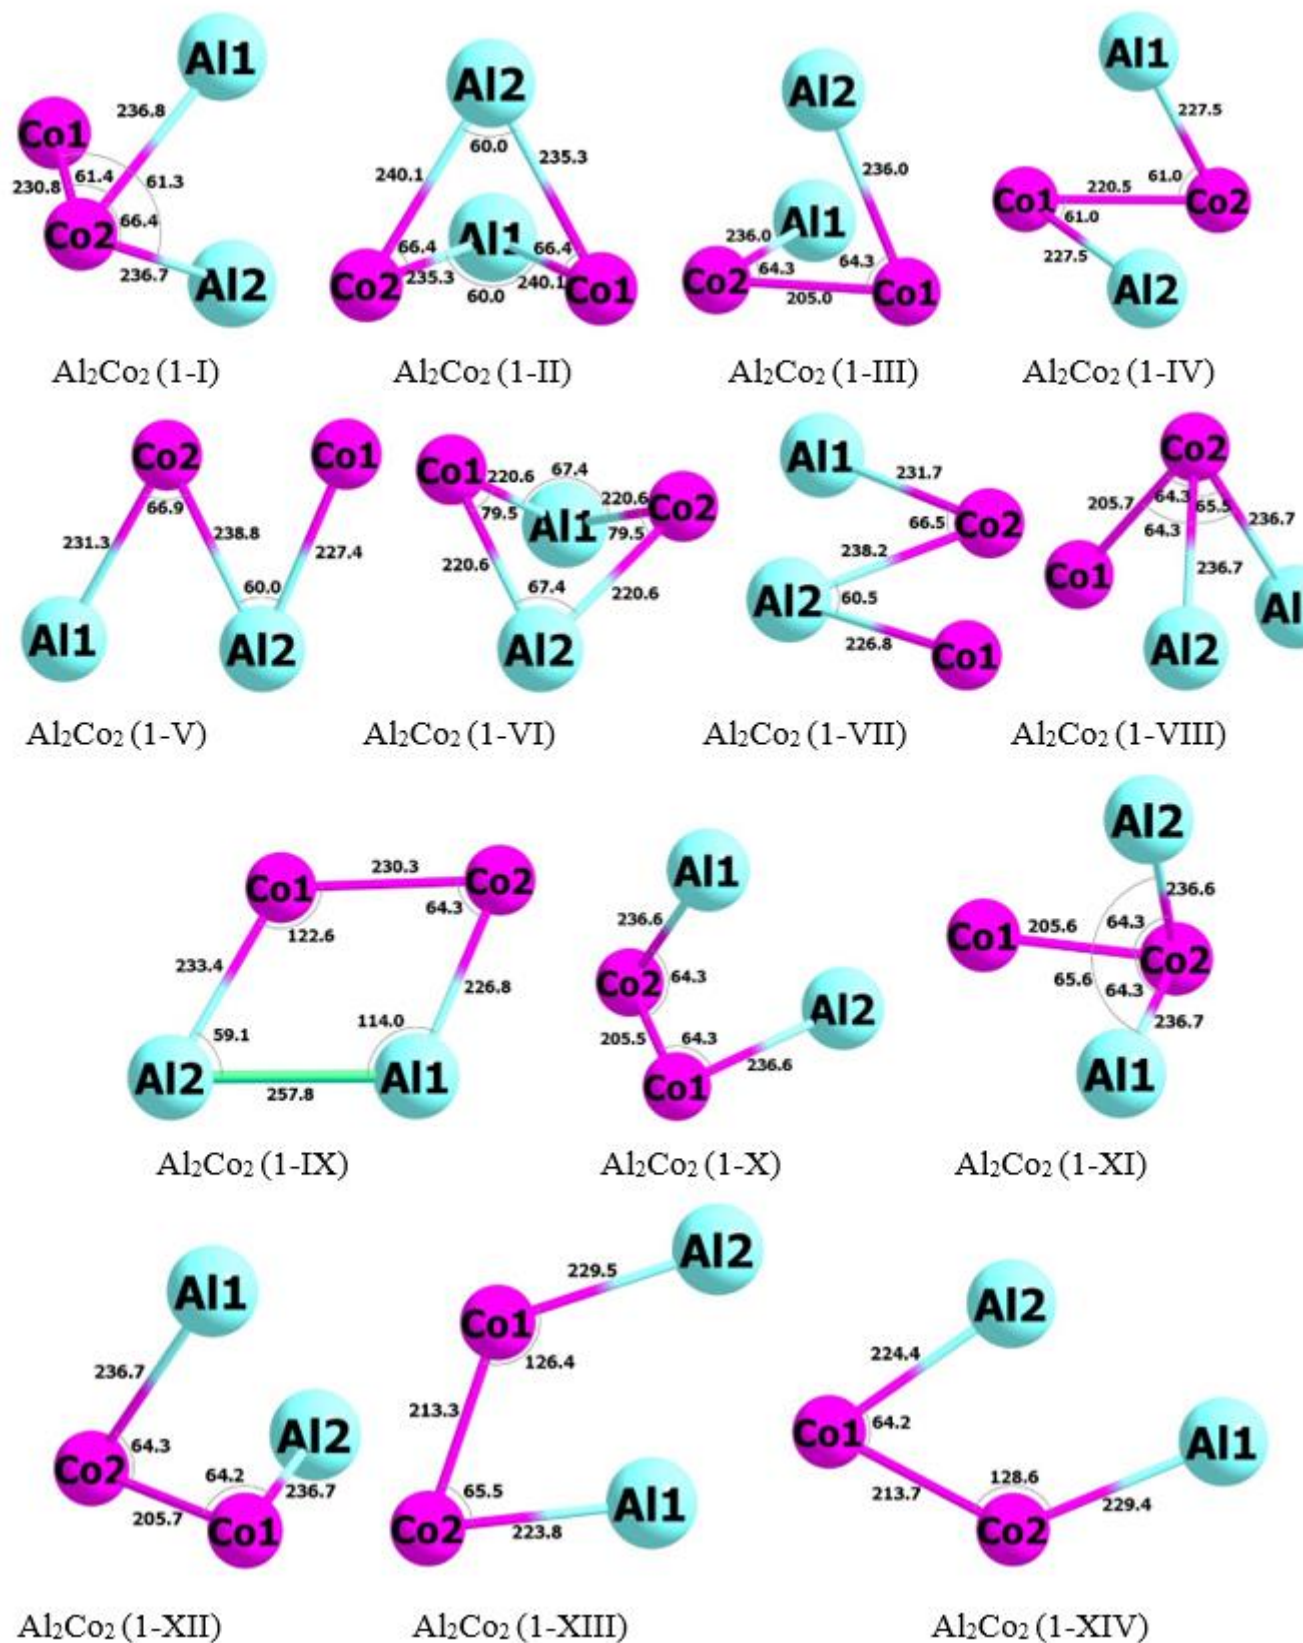

$\text{Al}_2\text{Co}_2$  clusters having ground state with  $M_s = 3$

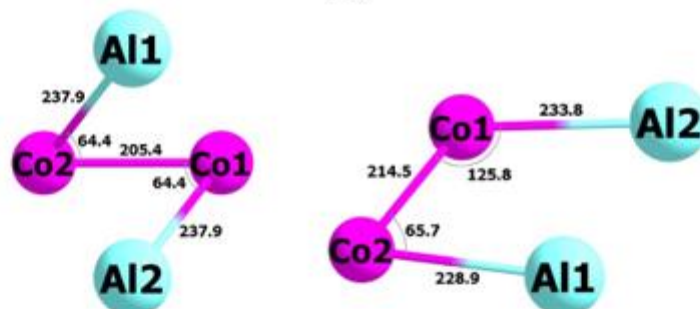

$\text{Al}_2\text{Co}_2$  (3-I)

$\text{Al}_2\text{Co}_2$  (3-II)

$\text{Al}_2\text{Co}_2$  clusters having ground state with  $M_s = 5$

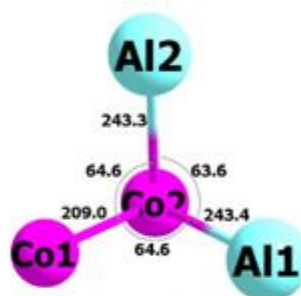

$\text{Al}_2\text{Co}_2$  (5-I)

$\text{Al}_2\text{Co}_2$  clusters having ground state with  $M_s = 7$

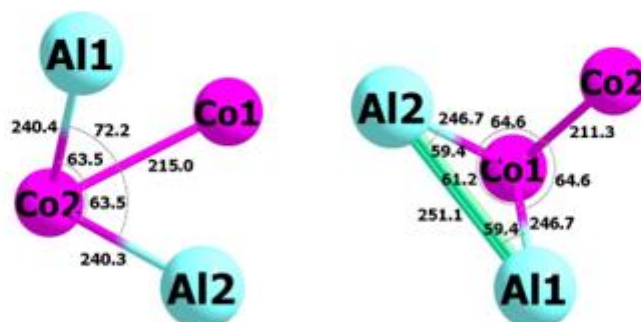

$\text{Al}_2\text{Co}_2$  (7-I)

$\text{Al}_2\text{Co}_2$  (7-II)

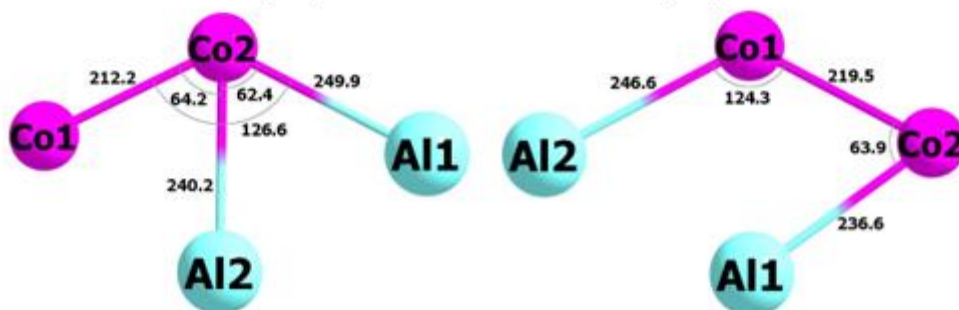

$\text{Al}_2\text{Co}_2$  (7-III)

$\text{Al}_2\text{Co}_2$  (7-IV)

Figure S7. Molecular structures of  $\text{Al}_2\text{Co}_2$  metal clusters.

$\text{Al}_2\text{Ni}_2$  clusters having ground state with  $M_S = 1$

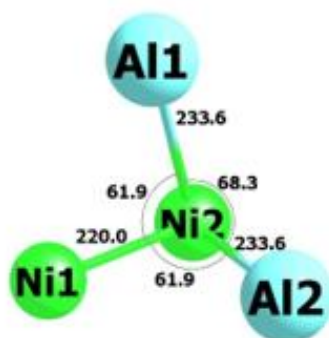

$\text{Al}_2\text{Ni}_2$  (1-I)

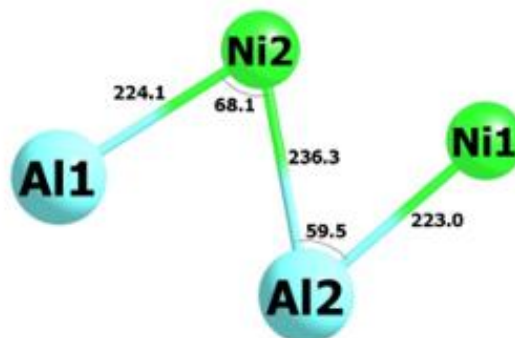

$\text{Al}_2\text{Ni}_2$  (1-II)

$\text{Al}_2\text{Ni}_2$  clusters having ground state with  $M_S = 3$

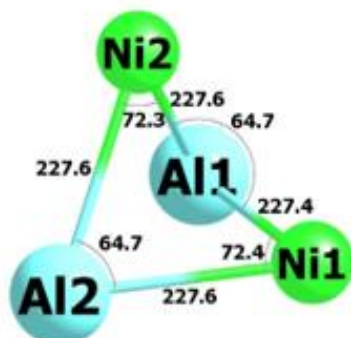

$\text{Al}_2\text{Ni}_2$  (3-I)

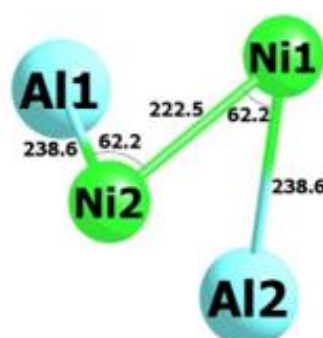

$\text{Al}_2\text{Ni}_2$  (3-II)

$\text{Al}_2\text{Ni}_2$  clusters having ground state with  $M_S = 5$

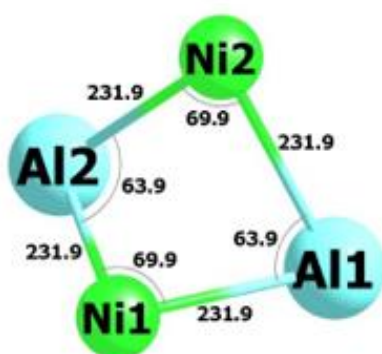

$\text{Al}_2\text{Ni}_2$  (5-I)

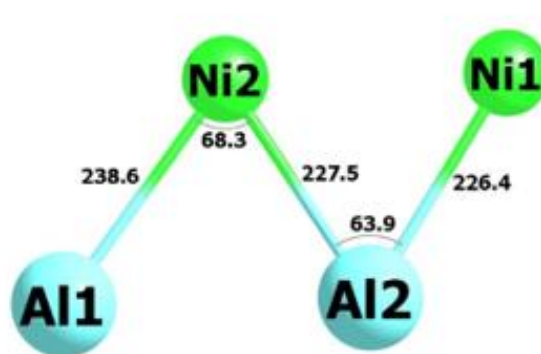

$\text{Al}_2\text{Ni}_2$  (5-II)

Figure S8. Molecular structures of  $\text{Al}_2\text{Ni}_2$  metal clusters.



$\text{Al}_2\text{Cu}_2$  clusters having ground state with  $M_s = 1$

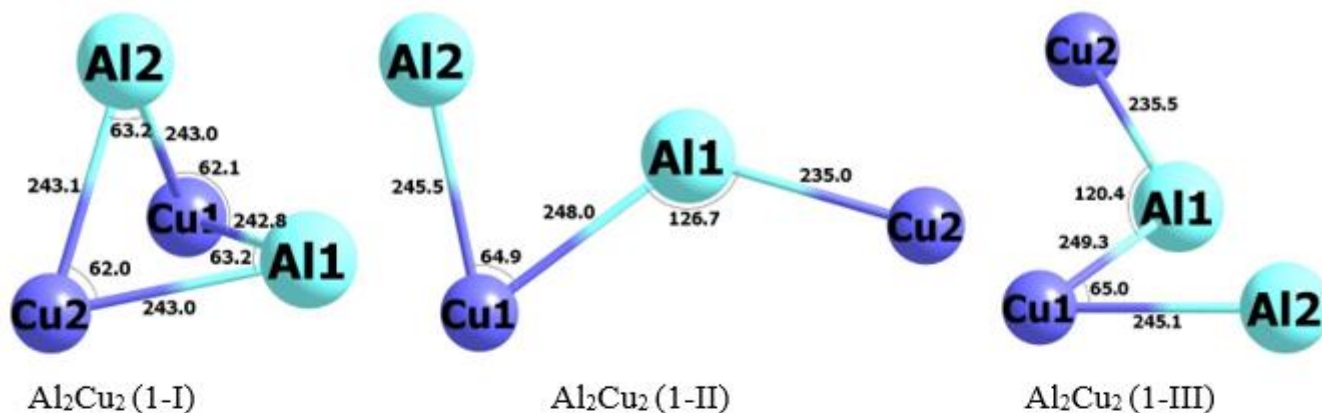

$\text{Al}_2\text{Cu}_2$  clusters having ground state with  $M_s = 3$

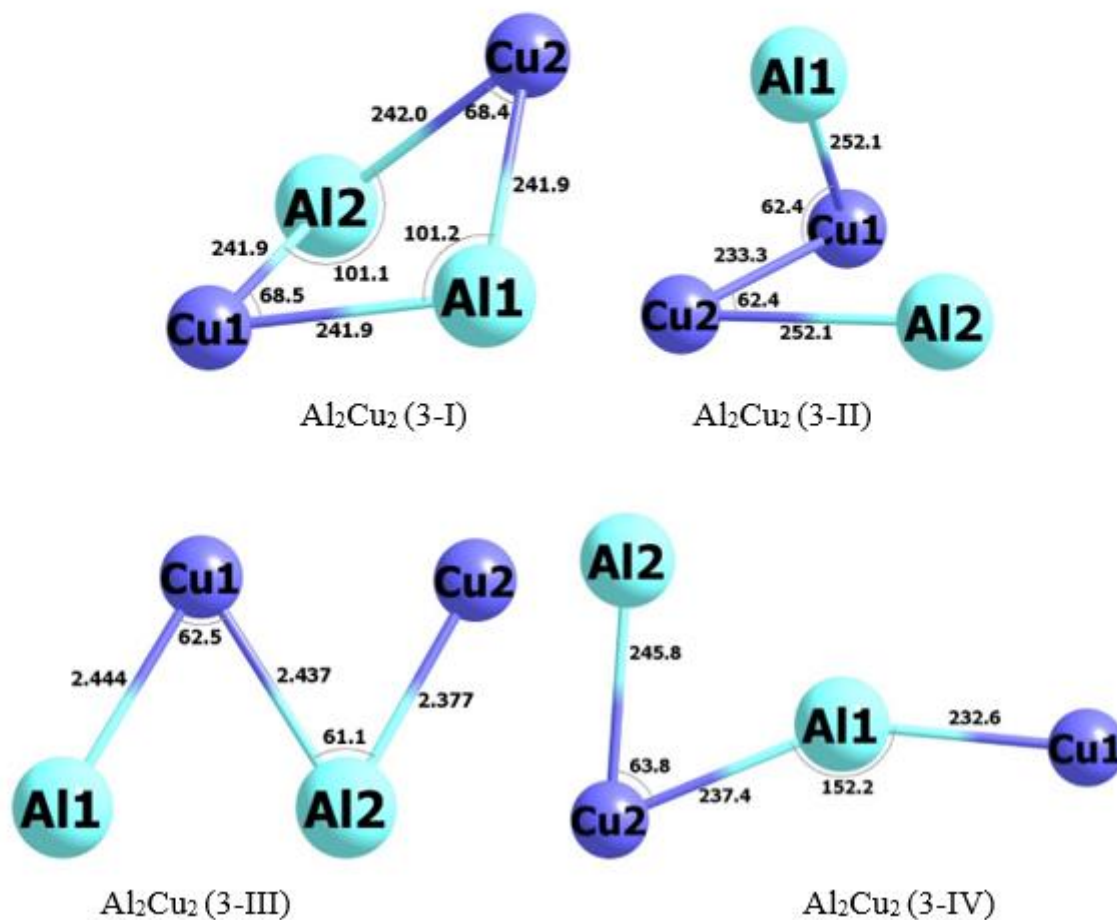

$\text{Al}_2\text{Cu}_2$  clusters having ground state with  $M_S = 5$

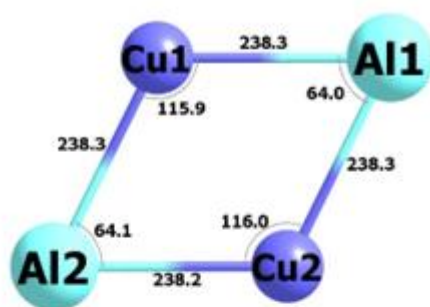

$\text{Al}_2\text{Cu}_2$  (5-I)

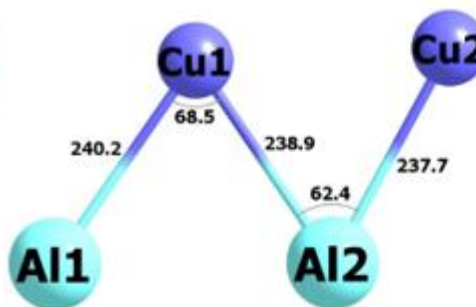

$\text{Al}_2\text{Cu}_2$  (5-II)

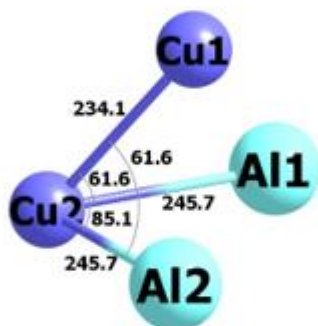

$\text{Al}_2\text{Cu}_2$  (5-III)

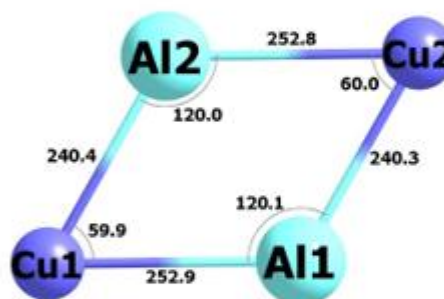

$\text{Al}_2\text{Cu}_2$  (5-IV)

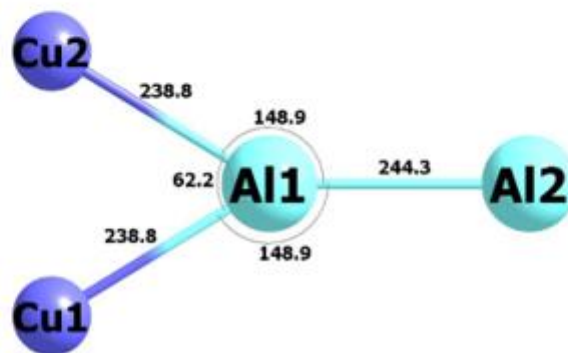

$\text{Al}_2\text{Cu}_2$  (5-V)

Figure S9. Molecular structures of  $\text{Al}_2\text{Cu}_2$  metal clusters.

$\text{Al}_2\text{Zn}_2$  clusters having ground state with  $M_s = 1$

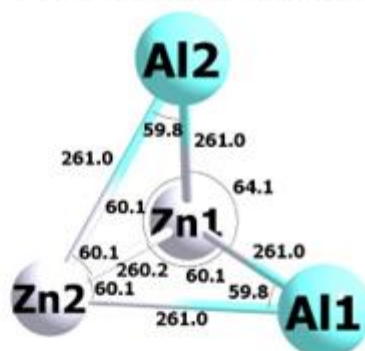

$\text{Al}_2\text{Zn}_2$  (1-I)

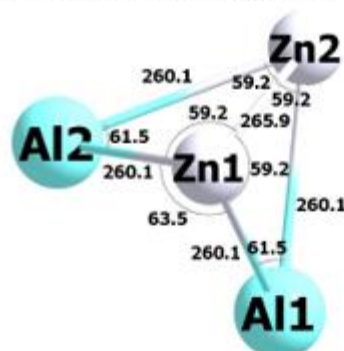

$\text{Al}_2\text{Zn}_2$  (1-II)

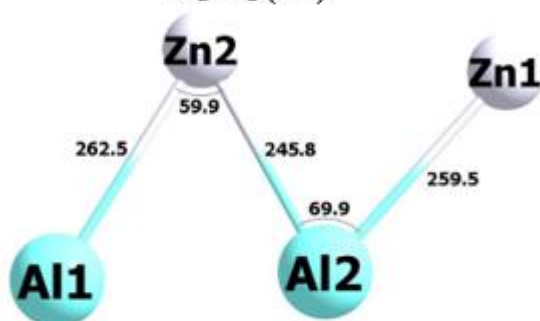

$\text{Al}_2\text{Zn}_2$  (1-III)

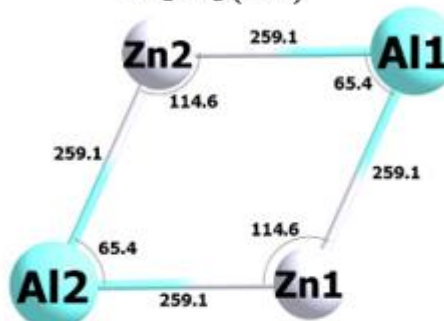

$\text{Al}_2\text{Zn}_2$  (1-IV)

$\text{Al}_2\text{Zn}_2$  clusters having ground state with  $M_s = 3$

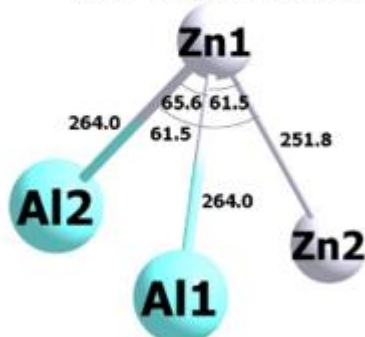

$\text{Al}_2\text{Zn}_2$  (3-I)

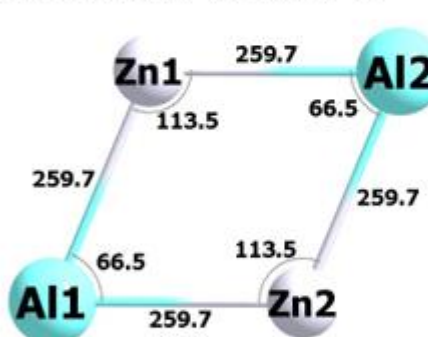

$\text{Al}_2\text{Zn}_2$  (3-II)

$\text{Al}_2\text{Zn}_2$  clusters having ground state with  $M_s = 5$

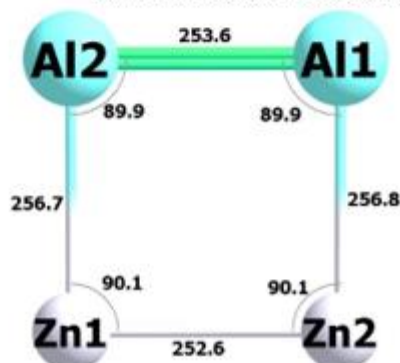

$\text{Al}_2\text{Zn}_2$  (5-I)

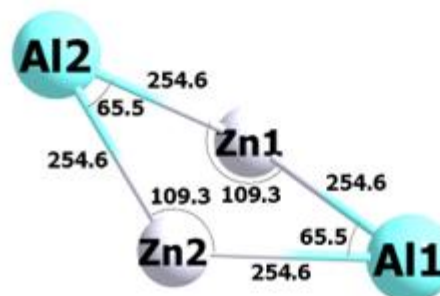

$\text{Al}_2\text{Zn}_2$  (5-II)

Figure S10. Molecular structures of  $\text{Al}_2\text{Zn}_2$  metal clusters.

**Table S1.** Relative energies and spin multiplicities of the ground states of various isomers of Al<sub>2</sub>Sc<sub>2</sub> metal clusters.

| Structure Designation                   | Relative Energy, kJ/mol | Structure Designation                     | Relative Energy, kJ/mol |
|-----------------------------------------|-------------------------|-------------------------------------------|-------------------------|
| Metal clusters with $M_s = 1$           |                         | Metal clusters with $M_s = 3$             |                         |
| Al <sub>2</sub> Sc <sub>2</sub> (1-I)*  | 15.0                    | <b>Al<sub>2</sub>Sc<sub>2</sub> (3-I)</b> | <b>0.0</b>              |
| Al <sub>2</sub> Sc <sub>2</sub> (1-II)* | 18.7                    | Metal clusters with $M_s = 5$             |                         |
| Al <sub>2</sub> Sc <sub>2</sub> (1-III) | 46.5                    | Al <sub>2</sub> Sc <sub>2</sub> (5-I)     | 18.6                    |
| Al <sub>2</sub> Sc <sub>2</sub> (1-IV)  | 51.9                    | Al <sub>2</sub> Sc <sub>2</sub> (5-II)    | 59.4                    |

**Table S2.** Relative energies and spin multiplicities of the ground states of various isomers of Al<sub>2</sub>Ti<sub>2</sub> metal clusters.

| Structure Designation                    | Relative Energy, kJ/mol | Structure Designation                     | Relative Energy, kJ/mol |
|------------------------------------------|-------------------------|-------------------------------------------|-------------------------|
| Metal clusters with $M_s = 1$            |                         | Al <sub>2</sub> Ti <sub>2</sub> (1-VIII)  | 105.0                   |
| Al <sub>2</sub> Ti <sub>2</sub> (1-I)*   | 17.3                    | Metal clusters with $M_s = 3$             |                         |
| Al <sub>2</sub> Ti <sub>2</sub> (1-II)*  | 39.5                    | <b>Al<sub>2</sub>Ti<sub>2</sub> (3-I)</b> | <b>0.0</b>              |
| Al <sub>2</sub> Ti <sub>2</sub> (1-III)  | 40.1                    | Al <sub>2</sub> Ti <sub>2</sub> (3-II)    | 41.6                    |
| Al <sub>2</sub> Ti <sub>2</sub> (1-IV)*  | 46.0                    | Metal clusters with $M_s = 5$             |                         |
| Al <sub>2</sub> Ti <sub>2</sub> (1-V)*   | 50.0                    | Al <sub>2</sub> Ti <sub>2</sub> (5-I)     | 5.7                     |
| Al <sub>2</sub> Ti <sub>2</sub> (1-VI)   | 55.2                    | Al <sub>2</sub> Ti <sub>2</sub> (5-II)    | 12.7                    |
| Al <sub>2</sub> Ti <sub>2</sub> (1-VII)* | 90.9                    | Al <sub>2</sub> Ti <sub>2</sub> (5-III)   | 14.4                    |

**Table S3.** Relative energies and spin multiplicities of the ground states of various isomers of Al<sub>2</sub>V<sub>2</sub> metal clusters.

| Structure Designation                   | Relative Energy, kJ/mol | Structure Designation                    | Relative Energy, kJ/mol |
|-----------------------------------------|-------------------------|------------------------------------------|-------------------------|
| Metal clusters with $M_s = 1$           |                         | Metal clusters with $M_s = 3$            |                         |
| Al <sub>2</sub> V <sub>2</sub> (1-I)*   | 2.7                     | <b>Al<sub>2</sub>V<sub>2</sub> (3-I)</b> | <b>0.0</b>              |
| Al <sub>2</sub> V <sub>2</sub> (1-II)*  | 9.7                     | Al <sub>2</sub> V <sub>2</sub> (3-II)    | 40.2                    |
| Al <sub>2</sub> V <sub>2</sub> (1-III)* | 13.9                    | Al <sub>2</sub> V <sub>2</sub> (3-III)   | 112.5                   |
| Al <sub>2</sub> V <sub>2</sub> (1-IV)*  | 17.0                    | Metal clusters with $M_s = 5$            |                         |
| Al <sub>2</sub> V <sub>2</sub> (1-V)    | 27.9                    | Al <sub>2</sub> V <sub>2</sub> (5-I)     | 41.0                    |
| Al <sub>2</sub> V <sub>2</sub> (1-VI)   | 33.9                    | Al <sub>2</sub> V <sub>2</sub> (5-II)    | 61.5                    |
| Al <sub>2</sub> V <sub>2</sub> (1-VII)* | 38.1                    | Al <sub>2</sub> V <sub>2</sub> (5-III)   | 100.8                   |
| Al <sub>2</sub> V <sub>2</sub> (1-VIII) | 42.6                    |                                          |                         |

**Table S4.** Relative energies and spin multiplicities of the ground states of various isomers of Al<sub>2</sub>Cr<sub>2</sub> metal clusters.

| Structure Designation                      | Relative Energy, kJ/mol | Structure Designation                   | Relative Energy, kJ/mol |
|--------------------------------------------|-------------------------|-----------------------------------------|-------------------------|
| Metal clusters with $M_s = 1$              |                         | Al <sub>2</sub> Cr <sub>2</sub> (3-II)  | 63.7                    |
| <b>Al<sub>2</sub>Cr<sub>2</sub> (1-I)*</b> | <b>0.0</b>              | Al <sub>2</sub> Cr <sub>2</sub> (3-III) | 87.6                    |
| Al <sub>2</sub> Cr <sub>2</sub> (1-II)     | 117.2                   | Metal clusters with $M_s = 5$           |                         |
| Al <sub>2</sub> Cr <sub>2</sub> (1-III)    | 213.7                   | Al <sub>2</sub> Cr <sub>2</sub> (5-I)   | 172.1                   |
| Metal clusters with $M_s = 3$              |                         | Al <sub>2</sub> Cr <sub>2</sub> (5-II)  | 180.1                   |
| Al <sub>2</sub> Cr <sub>2</sub> (3-I)      | 32.7                    | Al <sub>2</sub> Cr <sub>2</sub> (5-III) | 192.6                   |



**Table S5.** Relative energies and spin multiplicities of the ground states of various isomers of Al<sub>2</sub>Mn<sub>2</sub> metal clusters.

| Structure Designation                    | Relative Energy, kJ/mol | Structure Designation                   | Relative Energy, kJ/mol |
|------------------------------------------|-------------------------|-----------------------------------------|-------------------------|
| Metal clusters with $M_S = 1$            |                         | Al <sub>2</sub> Mn <sub>2</sub> (3-III) | 163.1                   |
| Al <sub>2</sub> Mn <sub>2</sub> (1-I)*   | 0.0                     | Metal clusters with $M_S = 5$           |                         |
| Al <sub>2</sub> Mn <sub>2</sub> (1-II)*  | 152.5                   | Al <sub>2</sub> Mn <sub>2</sub> (5-I)   | 140.6                   |
| Al <sub>2</sub> Mn <sub>2</sub> (1-III)* | 190.8                   | Al <sub>2</sub> Mn <sub>2</sub> (5-II)  | 145.0                   |
| Al <sub>2</sub> Mn <sub>2</sub> (1-IV)*  | 197.7                   | Al <sub>2</sub> Mn <sub>2</sub> (5-III) | 145.4                   |
| Al <sub>2</sub> Mn <sub>2</sub> (1-V)    | 216.5                   | Al <sub>2</sub> Mn <sub>2</sub> (5-IV)  | 151.8                   |
| Al <sub>2</sub> Mn <sub>2</sub> (1-VI)*  | 250.3                   | Al <sub>2</sub> Mn <sub>2</sub> (5-V)   | 161.9                   |
| Al <sub>2</sub> Mn <sub>2</sub> (1-VII)* | 307.4                   | Al <sub>2</sub> Mn <sub>2</sub> (5-VI)  | 207.0                   |
| Al <sub>2</sub> Mn <sub>2</sub> (1-VIII) | 315.2                   | Al <sub>2</sub> Mn <sub>2</sub> (5-VII) | 214.3                   |
| Metal clusters with $M_S = 3$            |                         | Metal clusters with $M_S = 7$           |                         |
| Al <sub>2</sub> Mn <sub>2</sub> (3-I)    | 29.1                    | Al <sub>2</sub> Mn <sub>2</sub> (7-I)   | 52.7                    |
| Al <sub>2</sub> Mn <sub>2</sub> (3-II)   | 163.0                   | Al <sub>2</sub> Mn <sub>2</sub> (7-II)  | 192.5                   |

**Table S6.** Relative energies and spin multiplicities of the ground states of various isomers of Al<sub>2</sub>Fe<sub>2</sub> metal clusters.

| Structure Designation                     | Relative Energy, kJ/mol | Structure Designation                   | Relative Energy, kJ/mol |
|-------------------------------------------|-------------------------|-----------------------------------------|-------------------------|
| Metal clusters with $M_S = 1$             |                         | Al <sub>2</sub> Fe <sub>2</sub> (3-II)  | 69.2                    |
| Al <sub>2</sub> Fe <sub>2</sub> (1-I)*    | 48.7                    | Al <sub>2</sub> Fe <sub>2</sub> (3-III) | 143.8                   |
| Al <sub>2</sub> Fe <sub>2</sub> (1-II)*   | 49.8                    | Al <sub>2</sub> Fe <sub>2</sub> (3-IV)  | 147.3                   |
| Al <sub>2</sub> Fe <sub>2</sub> (1-III)*  | 136.3                   | Al <sub>2</sub> Fe <sub>2</sub> (3-V)   | 198.5                   |
| Al <sub>2</sub> Fe <sub>2</sub> (1-IV)*   | 142.4                   | Al <sub>2</sub> Fe <sub>2</sub> (3-VI)  | 236.3                   |
| Al <sub>2</sub> Fe <sub>2</sub> (1-V)*    | 155.0                   | Metal clusters with $M_S = 5$           |                         |
| Al <sub>2</sub> Fe <sub>2</sub> (1-VI)    | 196.6                   | Al <sub>2</sub> Fe <sub>2</sub> (5-I)   | 0.0                     |
| Al <sub>2</sub> Fe <sub>2</sub> (1-VII)*  | 236.3                   | Al <sub>2</sub> Fe <sub>2</sub> (5-II)  | 9.9                     |
| Al <sub>2</sub> Fe <sub>2</sub> (1-VIII)* | 245.5                   | Al <sub>2</sub> Fe <sub>2</sub> (5-III) | 53.5                    |
| Al <sub>2</sub> Fe <sub>2</sub> (1-IX)    | 261.7                   | Al <sub>2</sub> Fe <sub>2</sub> (5-IV)  | 55.2                    |
| Al <sub>2</sub> Fe <sub>2</sub> (1-X)     | 307.0                   | Al <sub>2</sub> Fe <sub>2</sub> (5-V)   | 70.6                    |
| Metal clusters with $M_S = 3$             |                         | Al <sub>2</sub> Fe <sub>2</sub> (5-VI)  | 254.8                   |
| Al <sub>2</sub> Fe <sub>2</sub> (3-I)     | 61.3                    |                                         |                         |

**Table S7.** Relative energies and spin multiplicities of the ground states of various isomers of Al<sub>2</sub>Co<sub>2</sub> metal clusters.

| Structure Designation                    | Relative Energy, kJ/mol | Structure Designation                     | Relative Energy, kJ/mol |
|------------------------------------------|-------------------------|-------------------------------------------|-------------------------|
| Metal clusters with $M_S = 1$            |                         | Al <sub>2</sub> Co <sub>2</sub> (1-XIII)* | 173.1                   |
| Al <sub>2</sub> Co <sub>2</sub> (1-I)*   | 72.7                    | Al <sub>2</sub> Co <sub>2</sub> (1-XIV)   | 241.2                   |
| Al <sub>2</sub> Co <sub>2</sub> (1-II)*  | 75.4                    | Metal clusters with $M_S = 3$             |                         |
| Al <sub>2</sub> Co <sub>2</sub> (1-III)* | 81.4                    | Al <sub>2</sub> Co <sub>2</sub> (3-I)     | 26.3                    |
| Al <sub>2</sub> Co <sub>2</sub> (1-IV)*  | 85.8                    | Al <sub>2</sub> Co <sub>2</sub> (3-II)    | 103.8                   |
| Al <sub>2</sub> Co <sub>2</sub> (1-V)*   | 135.2                   | Metal clusters with $M_S = 5$             |                         |
| Al <sub>2</sub> Co <sub>2</sub> (1-VI)   | 139.2                   | Al <sub>2</sub> Co <sub>2</sub> (5-I)     | 0.0                     |
| Al <sub>2</sub> Co <sub>2</sub> (1-VII)* | 141.0                   | Metal clusters with $M_S = 7$             |                         |
| Al <sub>2</sub> Co <sub>2</sub> (1-VIII) | 146.7                   | Al <sub>2</sub> Co <sub>2</sub> (7-I)     | 103.8                   |
| Al <sub>2</sub> Co <sub>2</sub> (1-IX)*  | 148.4                   | Al <sub>2</sub> Co <sub>2</sub> (7-II)    | 116.5                   |
| Al <sub>2</sub> Co <sub>2</sub> (1-X)    | 167.1                   | Al <sub>2</sub> Co <sub>2</sub> (7-III)   | 158.7                   |
| Al <sub>2</sub> Co <sub>2</sub> (1-XI)   | 168.4                   | Al <sub>2</sub> Co <sub>2</sub> (7-IV)    | 162.0                   |
| Al <sub>2</sub> Co <sub>2</sub> (1-XII)  | 168.5                   |                                           |                         |

**Table S8.** Relative energies and spin multiplicities of the ground states of various isomers of Al<sub>2</sub>Ni<sub>2</sub> metal clusters.

| Structure Designation                   | Relative Energy, kJ/mol | Structure Designation                  | Relative Energy, kJ/mol |
|-----------------------------------------|-------------------------|----------------------------------------|-------------------------|
| Metal clusters with $M_s = 1$           |                         | Al <sub>2</sub> Ni <sub>2</sub> (3-II) | 25.2                    |
| Al <sub>2</sub> Ni <sub>2</sub> (1-I)   | 0.0                     | Metal clusters with $M_s = 5$          |                         |
| Al <sub>2</sub> Ni <sub>2</sub> (1-II)* | 90.5                    | Al <sub>2</sub> Ni <sub>2</sub> (5-I)  | 118.6                   |
| Metal clusters with $M_s = 3$           |                         | Al <sub>2</sub> Ni <sub>2</sub> (5-II) | 190.1                   |
| Al <sub>2</sub> Ni <sub>2</sub> (3-I)   | 12.8                    |                                        |                         |

**Table S9.** Relative energies and spin multiplicities of the ground states of various isomers of Al<sub>2</sub>Cu<sub>2</sub> metal clusters.

| Structure Designation                   | Relative Energy, kJ/mol | Structure Designation                   | Relative Energy, kJ/mol |
|-----------------------------------------|-------------------------|-----------------------------------------|-------------------------|
| Metal clusters with $M_s = 1$           |                         | Al <sub>2</sub> Cu <sub>2</sub> (3-IV)  | 127.5                   |
| Al <sub>2</sub> Cu <sub>2</sub> (1-I)   | 0.0                     | Metal clusters with $M_s = 5$           |                         |
| Al <sub>2</sub> Cu <sub>2</sub> (1-II)* | 114.6                   | Al <sub>2</sub> Cu <sub>2</sub> (5-I)   | 215.3                   |
| Al <sub>2</sub> Cu <sub>2</sub> (1-III) | 115.7                   | Al <sub>2</sub> Cu <sub>2</sub> (5-II)  | 229.0                   |
| Metal clusters with $M_s = 3$           |                         | Al <sub>2</sub> Cu <sub>2</sub> (5-III) | 245.4                   |
| Al <sub>2</sub> Cu <sub>2</sub> (3-I)   | 79.3                    | Al <sub>2</sub> Cu <sub>2</sub> (5-IV)  | 260.7                   |
| Al <sub>2</sub> Cu <sub>2</sub> (3-II)  | 85.8                    | Al <sub>2</sub> Cu <sub>2</sub> (5-V)   | 274.6                   |
| Al <sub>2</sub> Cu <sub>2</sub> (3-III) | 105.7                   |                                         |                         |

**Table S10.** Relative energies and spin multiplicities of the ground states of various isomers of Al<sub>2</sub>Zn<sub>2</sub> metal clusters.

| Structure Designation                   | Relative Energy, kJ/mol | Structure Designation                  | Relative Energy, kJ/mol |
|-----------------------------------------|-------------------------|----------------------------------------|-------------------------|
| Metal clusters with $M_s = 1$           |                         | Metal clusters with $M_s = 3$          |                         |
|                                         |                         | Al <sub>2</sub> Zn <sub>2</sub> (3-I)  | 16.3                    |
| Al <sub>2</sub> Zn <sub>2</sub> (1-I)*  | 0.0                     | Al <sub>2</sub> Zn <sub>2</sub> (3-II) | 47.4                    |
| Al <sub>2</sub> Zn <sub>2</sub> (1-II)  | 3.5                     | Metal clusters with $M_s = 5$          |                         |
| Al <sub>2</sub> Zn <sub>2</sub> (1-III) | 45.4                    | Al <sub>2</sub> Zn <sub>2</sub> (5-I)  | 82.0                    |
| Al <sub>2</sub> Zn <sub>2</sub> (1-IV)* | 60.9                    | Al <sub>2</sub> Zn <sub>2</sub> (5-II) | 151.3                   |

**Table S11.** The values of energies (are given in eV) of highest occupied (HOMO) and lowest unoccupied (LUMO) molecular orbitals, and values of gap. The symbol “a” corresponds to electron with spin (+1/2), “b”, to electron with spin (−1/2).

| Cluster                                 | HOMO (a) | LUMO (a) | Δ (a)  | HOMO (b) | LUMO (b) | Δ (b)  |
|-----------------------------------------|----------|----------|--------|----------|----------|--------|
| Al <sub>2</sub> Sc <sub>2</sub>         |          |          |        |          |          |        |
| Al <sub>2</sub> Sc <sub>2</sub> (1-I)*  | -3.443   | -2.766   | 0.677  | -3.384   | -2.691   | 0.693  |
| Al <sub>2</sub> Sc <sub>2</sub> (1-II)* | -3.397   | -2.773   | 0.624  | -3.398   | -2.773   | 0.625  |
| Al <sub>2</sub> Sc <sub>2</sub> (1-III) | -3.173   | -3.098   | 0.075  | -3.173   | -3.098   | 0.075  |
| Al <sub>2</sub> Sc <sub>2</sub> (1-IV)  | -3.159   | -3.191   | -0.032 | -3.159   | -3.191   | -0.032 |
| Al <sub>2</sub> Sc <sub>2</sub> (3-I)   | -3.479   | -2.842   | 0.637  | -3.534   | -2.617   | 0.917  |
| Al <sub>2</sub> Sc <sub>2</sub> (5-1)   | -3.321   | -2.669   | 0.652  | -3.839   | -3.036   | 0.802  |
| Al <sub>2</sub> Sc <sub>2</sub> (5-2)   | -3.303   | -2.678   | 0.625  | -3.386   | -3.177   | 0.209  |
| Al <sub>2</sub> Ti <sub>2</sub>         |          |          |        |          |          |        |
| Al <sub>2</sub> Ti <sub>2</sub> (1-I)*  | -4.110   | -3.369   | 0.742  | -4.171   | -3.248   | 0.923  |
| Al <sub>2</sub> Ti <sub>2</sub> (1-II)* | -3.830   | -3.347   | 0.482  | -3.830   | -3.347   | 0.482  |
| Al <sub>2</sub> Ti <sub>2</sub> (1-III) | -3.830   | -3.342   | 0.488  | -3.830   | -3.342   | 0.488  |
| Al <sub>2</sub> Ti <sub>2</sub> (1-IV)* | -3.793   | -3.334   | 0.459  | -3.793   | -3.334   | 0.459  |
| Al <sub>2</sub> Ti <sub>2</sub> (1-V)*  | -3.743   | -3.240   | 0.503  | -3.743   | -3.240   | 0.503  |

| Cluster                                    | HOMO (a)      | LUMO (a)      | $\Delta$ (a) | HOMO (b)      | LUMO (b)      | $\Delta$ (b) |
|--------------------------------------------|---------------|---------------|--------------|---------------|---------------|--------------|
| Al <sub>2</sub> Ti <sub>2</sub> (1-VI)     | -3.766        | -3.495        | 0.271        | -3.766        | -3.495        | 0.271        |
| Al <sub>2</sub> Ti <sub>2</sub> (1-VII)*   | -3.855        | -3.045        | 0.811        | -3.983        | -3.278        | 0.705        |
| Al <sub>2</sub> Ti <sub>2</sub> (1-VIII)   | -3.361        | -3.071        | 0.290        | -3.361        | -3.071        | 0.290        |
| <b>Al<sub>2</sub>Ti<sub>2</sub> (3-I)</b>  | <b>-4.212</b> | <b>-3.395</b> | <b>0.817</b> | <b>-3.998</b> | <b>-3.080</b> | <b>0.918</b> |
| Al <sub>2</sub> Ti <sub>2</sub> (3-II)     | -3.486        | -3.238        | 0.247        | -3.499        | -2.582        | 0.917        |
| Al <sub>2</sub> Ti <sub>2</sub> (5-I)      | -3.819        | -3.433        | 0.387        | -4.035        | -3.318        | 0.717        |
| Al <sub>2</sub> Ti <sub>2</sub> (5-II)     | -3.648        | -3.364        | 0.284        | -3.897        | -3.049        | 0.848        |
| Al <sub>2</sub> Ti <sub>2</sub> (5-III)    | -3.654        | -3.482        | 0.173        | -3.914        | -3.116        | 0.799        |
| Al <sub>2</sub> V <sub>2</sub>             |               |               |              |               |               |              |
| Al <sub>2</sub> V <sub>2</sub> (1-I)*      | -3.854        | -3.015        | 0.839        | -3.854        | -3.015        | 0.839        |
| Al <sub>2</sub> V <sub>2</sub> (1-II)*     | -4.074        | -3.557        | 0.516        | -4.074        | -3.557        | 0.516        |
| Al <sub>2</sub> V <sub>2</sub> (1-III)*    | -3.897        | -3.444        | 0.453        | -3.897        | -3.444        | 0.453        |
| Al <sub>2</sub> V <sub>2</sub> (1-IV)*     | -4.050        | -3.722        | 0.328        | -4.114        | -3.687        | 0.427        |
| Al <sub>2</sub> V <sub>2</sub> (1-V)       | -3.857        | -3.570        | 0.287        | -3.857        | -3.570        | 0.287        |
| Al <sub>2</sub> V <sub>2</sub> (1-VI)      | -4.201        | -3.984        | 0.218        | -4.201        | -3.984        | 0.218        |
| Al <sub>2</sub> V <sub>2</sub> (1-VII)*    | -3.915        | -3.287        | 0.628        | -4.140        | -2.957        | 1.183        |
| Al <sub>2</sub> V <sub>2</sub> (1-VIII)    | -3.858        | -3.250        | 0.608        | -3.858        | -3.250        | 0.608        |
| <b>Al<sub>2</sub>V<sub>2</sub> (3-I)</b>   | <b>-4.157</b> | <b>-2.992</b> | <b>1.165</b> | <b>-4.010</b> | <b>-3.524</b> | <b>0.486</b> |
| Al <sub>2</sub> V <sub>2</sub> (3-II)      | -3.896        | -3.033        | 0.864        | -4.041        | -3.285        | 0.756        |
| Al <sub>2</sub> V <sub>2</sub> (3-III)     | -3.997        | -3.814        | 0.183        | -4.100        | -3.661        | 0.438        |
| Al <sub>2</sub> V <sub>2</sub> (5-I)       | -3.471        | -2.585        | 0.886        | -4.058        | -3.241        | 0.817        |
| Al <sub>2</sub> V <sub>2</sub> (5-II)      | -4.043        | -3.151        | 0.892        | -4.074        | -3.654        | 0.421        |
| Al <sub>2</sub> V <sub>2</sub> (5-III)     | -3.413        | -2.834        | 0.579        | -4.152        | -3.689        | 0.463        |
| Al <sub>2</sub> Cr <sub>2</sub>            |               |               |              |               |               |              |
| <b>Al<sub>2</sub>Cr<sub>2</sub> (1-I)*</b> | <b>-3.831</b> | <b>-3.143</b> | <b>0.688</b> | <b>-3.831</b> | <b>-3.143</b> | <b>0.688</b> |
| Al <sub>2</sub> Cr <sub>2</sub> (1-II)     | -4.336        | -3.480        | 0.856        | -4.336        | -3.480        | 0.856        |
| Al <sub>2</sub> Cr <sub>2</sub> (1-III)    | -4.107        | -3.281        | 0.826        | -4.107        | -3.281        | 0.826        |
| Al <sub>2</sub> Cr <sub>2</sub> (3-I)      | -3.459        | -2.607        | 0.852        | -4.622        | -3.489        | 1.133        |
| Al <sub>2</sub> Cr <sub>2</sub> (3-II)     | -3.817        | -2.923        | 0.894        | -4.453        | -2.836        | 1.618        |
| Al <sub>2</sub> Cr <sub>2</sub> (3-III)    | -3.614        | -2.743        | 0.870        | -4.379        | -2.971        | 1.408        |
| Al <sub>2</sub> Cr <sub>2</sub> (5-I)      | -3.593        | -2.821        | 0.772        | -4.316        | -3.443        | 0.873        |
| Al <sub>2</sub> Cr <sub>2</sub> (5-II)     | -3.409        | -2.779        | 0.630        | -4.747        | -4.119        | 0.628        |
| Al <sub>2</sub> Cr <sub>2</sub> (5-III)    | -3.576        | -2.716        | 0.860        | -4.536        | -3.612        | 0.925        |
| Al <sub>2</sub> Mn <sub>2</sub>            |               |               |              |               |               |              |
| <b>Al<sub>2</sub>Mn<sub>2</sub> (1-I)*</b> | <b>-3.708</b> | <b>-2.952</b> | <b>0.756</b> | <b>-3.708</b> | <b>-2.952</b> | <b>0.756</b> |
| Al <sub>2</sub> Mn <sub>2</sub> (1-II)*    | -3.929        | -3.506        | 0.423        | -3.598        | -3.101        | 0.498        |
| Al <sub>2</sub> Mn <sub>2</sub> (1-III)*   | -4.342        | -3.389        | 0.953        | -4.342        | -3.389        | 0.953        |
| Al <sub>2</sub> Mn <sub>2</sub> (1-IV)*    | -4.202        | -3.665        | 0.537        | -4.409        | -3.161        | 1.248        |
| Al <sub>2</sub> Mn <sub>2</sub> (1-V)      | -4.020        | -3.815        | 0.205        | -4.020        | -3.815        | 0.205        |
| Al <sub>2</sub> Mn <sub>2</sub> (1-VI)*    | -3.587        | -2.601        | 0.986        | -3.991        | -3.849        | 0.142        |
| Al <sub>2</sub> Mn <sub>2</sub> (1-VII)*   | -3.744        | -3.588        | 0.156        | -3.744        | -3.587        | 0.157        |
| Al <sub>2</sub> Mn <sub>2</sub> (1-VIII)   | -3.494        | -3.338        | 0.156        | -3.494        | -3.338        | 0.156        |
| Al <sub>2</sub> Mn <sub>2</sub> (3-I)      | -3.558        | -3.136        | 0.422        | -4.495        | -3.441        | 1.054        |
| Al <sub>2</sub> Mn <sub>2</sub> (3-II)     | -4.522        | -3.620        | 0.902        | -4.250        | -3.344        | 0.906        |
| Al <sub>2</sub> Mn <sub>2</sub> (3-III)    | -4.522        | -3.619        | 0.903        | -4.251        | -3.344        | 0.906        |
| Al <sub>2</sub> Mn <sub>2</sub> (5-I)      | -3.448        | -3.273        | 0.176        | -5.023        | -3.710        | 1.312        |
| Al <sub>2</sub> Mn <sub>2</sub> (5-II)     | -4.332        | -4.143        | 0.189        | -4.193        | -3.307        | 0.886        |

| Cluster                                   | HOMO (a)      | LUMO (a)      | $\Delta$ (a) | HOMO (b)      | LUMO (b)      | $\Delta$ (b) |
|-------------------------------------------|---------------|---------------|--------------|---------------|---------------|--------------|
| Al <sub>2</sub> Mn <sub>2</sub> (5-III)   | -4.317        | -4.147        | 0.171        | -4.237        | -3.323        | 0.913        |
| Al <sub>2</sub> Mn <sub>2</sub> (5-IV)    | -4.550        | -3.927        | 0.623        | -3.729        | -2.854        | 0.875        |
| Al <sub>2</sub> Mn <sub>2</sub> (5-V)     | -3.517        | -2.615        | 0.902        | -4.893        | -3.594        | 1.298        |
| Al <sub>2</sub> Mn <sub>2</sub> (5-VI)    | -4.244        | -3.760        | 0.484        | -3.713        | -2.688        | 1.025        |
| Al <sub>2</sub> Mn <sub>2</sub> (5-VII)   | -4.776        | -3.948        | 0.828        | -3.241        | -2.677        | 0.564        |
| Al <sub>2</sub> Mn <sub>2</sub> (7-I)     | -4.797        | -3.776        | 1.021        | -3.751        | -3.013        | 0.738        |
| Al <sub>2</sub> Mn <sub>2</sub> (7-II)    | -4.859        | -3.609        | 1.250        | -3.519        | -3.030        | 0.490        |
| Al <sub>2</sub> Fe <sub>2</sub>           |               |               |              |               |               |              |
| Al <sub>2</sub> Fe <sub>2</sub> (1-I)*    | -3.897        | -3.292        | 0.604        | -3.897        | -3.292        | 0.604        |
| Al <sub>2</sub> Fe <sub>2</sub> (1-II)*   | -3.891        | -3.256        | 0.634        | -3.891        | -3.256        | 0.634        |
| Al <sub>2</sub> Fe <sub>2</sub> (1-III)*  | -3.488        | -3.210        | 0.277        | -3.940        | -3.373        | 0.567        |
| Al <sub>2</sub> Fe <sub>2</sub> (1-IV)*   | -4.532        | -3.741        | 0.792        | -4.532        | -3.741        | 0.792        |
| Al <sub>2</sub> Fe <sub>2</sub> (1-V)*    | -4.095        | -2.981        | 1.114        | -4.249        | -3.629        | 0.620        |
| Al <sub>2</sub> Fe <sub>2</sub> (1-VI)    | -4.011        | -4.086        | -0.075       | -4.011        | -4.086        | -0.075       |
| Al <sub>2</sub> Fe <sub>2</sub> (1-VII)*  | -4.073        | -3.369        | 0.704        | -4.074        | -3.370        | 0.703        |
| Al <sub>2</sub> Fe <sub>2</sub> (1-VIII)* | -3.969        | -3.408        | 0.561        | -3.969        | -3.408        | 0.561        |
| Al <sub>2</sub> Fe <sub>2</sub> (1-IX)    | -3.631        | -4.357        | -0.727       | -3.631        | -4.357        | -0.727       |
| Al <sub>2</sub> Fe <sub>2</sub> (1-X)     | -3.516        | -3.625        | -0.110       | -3.516        | -3.625        | -0.110       |
| Al <sub>2</sub> Fe <sub>2</sub> (3-I)     | -4.651        | -3.698        | 0.953        | -3.761        | -2.602        | 1.159        |
| Al <sub>2</sub> Fe <sub>2</sub> (3-II)    | -4.385        | -3.604        | 0.781        | -3.972        | -3.369        | 0.604        |
| Al <sub>2</sub> Fe <sub>2</sub> (3-III)   | -3.946        | -3.030        | 0.916        | -4.067        | -3.092        | 0.975        |
| Al <sub>2</sub> Fe <sub>2</sub> (3-IV)    | -3.663        | -3.356        | 0.307        | -4.290        | -3.546        | 0.744        |
| Al <sub>2</sub> Fe <sub>2</sub> (3-V)     | -4.163        | -3.342        | 0.821        | -3.644        | -3.191        | 0.453        |
| Al <sub>2</sub> Fe <sub>2</sub> (3-VI)    | -4.410        | -3.456        | 0.954        | -3.122        | -2.764        | 0.358        |
| <b>Al<sub>2</sub>Fe<sub>2</sub> (5-I)</b> | <b>-4.843</b> | <b>-3.723</b> | <b>1.120</b> | <b>-3.825</b> | <b>-3.555</b> | <b>0.270</b> |
| Al <sub>2</sub> Fe <sub>2</sub> (5-II)    | -4.737        | -3.706        | 1.031        | -3.720        | -3.651        | 0.070        |
| Al <sub>2</sub> Fe <sub>2</sub> (5-III)   | -4.198        | -4.054        | 0.144        | -3.961        | -3.512        | 0.449        |
| Al <sub>2</sub> Fe <sub>2</sub> (5-IV)    | -4.720        | -3.141        | 1.580        | -3.568        | -2.874        | 0.695        |
| Al <sub>2</sub> Fe <sub>2</sub> (5-V)     | -4.686        | -3.056        | 1.629        | -3.251        | -2.937        | 0.315        |
| Al <sub>2</sub> Fe <sub>2</sub> (5-VI)    | -3.597        | -2.957        | 0.640        | -4.313        | -3.927        | 0.386        |
| Al <sub>2</sub> Co <sub>2</sub>           |               |               |              |               |               |              |
| Al <sub>2</sub> Co <sub>2</sub> (1-I)*    | -4.374        | -3.825        | 0.550        | -4.313        | -3.707        | 0.606        |
| Al <sub>2</sub> Co <sub>2</sub> (1-II)*   | -4.304        | -3.782        | 0.523        | -4.304        | -3.782        | 0.522        |
| Al <sub>2</sub> Co <sub>2</sub> (1-III)*  | -4.473        | -3.853        | 0.621        | -4.421        | -3.950        | 0.470        |
| Al <sub>2</sub> Co <sub>2</sub> (1-IV)*   | -4.217        | -3.660        | 0.557        | -3.882        | -3.406        | 0.476        |
| Al <sub>2</sub> Co <sub>2</sub> (1-V)*    | -3.902        | -3.134        | 0.768        | -3.990        | -3.224        | 0.767        |
| Al <sub>2</sub> Co <sub>2</sub> (1-VI)    | -3.599        | -3.546        | 0.053        | -3.599        | -3.546        | 0.053        |
| Al <sub>2</sub> Co <sub>2</sub> (1-VII)*  | -3.912        | -3.327        | 0.585        | -4.011        | -3.212        | 0.799        |
| Al <sub>2</sub> Co <sub>2</sub> (1-VIII)  | -4.207        | -4.644        | -0.437       | -4.207        | -4.644        | -0.437       |
| Al <sub>2</sub> Co <sub>2</sub> (1-IX)*   | -3.944        | -3.155        | 0.789        | -3.962        | -3.444        | 0.518        |
| Al <sub>2</sub> Co <sub>2</sub> (1-X)     | -4.050        | -4.702        | -0.652       | -4.050        | -4.702        | -0.652       |
| Al <sub>2</sub> Co <sub>2</sub> (1-XI)    | -4.159        | -4.872        | -0.713       | -4.159        | -4.872        | -0.713       |
| Al <sub>2</sub> Co <sub>2</sub> (1-XII)   | -4.159        | -4.872        | -0.713       | -4.159        | -4.872        | -0.713       |
| Al <sub>2</sub> Co <sub>2</sub> (1-XIII)* | -3.910        | -3.477        | 0.432        | -3.909        | -3.477        | 0.432        |
| Al <sub>2</sub> Co <sub>2</sub> (1-XIV)   | -3.782        | -4.208        | -0.426       | -3.782        | -4.208        | -0.426       |
| Al <sub>2</sub> Co <sub>2</sub> (3-I)     | -4.586        | -3.822        | 0.764        | -3.872        | -3.394        | 0.478        |
| Al <sub>2</sub> Co <sub>2</sub> (3-II)    | -4.672        | -3.079        | 1.593        | -3.639        | -3.151        | 0.488        |



| Cluster                                    | HOMO (a)      | LUMO (a)      | $\Delta$ (a) | HOMO (b)      | LUMO (b)      | $\Delta$ (b) |
|--------------------------------------------|---------------|---------------|--------------|---------------|---------------|--------------|
| <b>Al<sub>2</sub>Co<sub>2</sub> (5-I)</b>  | <b>-4.544</b> | <b>-3.052</b> | <b>1.492</b> | <b>-4.691</b> | <b>-4.009</b> | <b>0.682</b> |
| Al <sub>2</sub> Co <sub>2</sub> (7-I)      | -3.659        | -2.690        | 0.969        | -4.715        | -4.285        | 0.430        |
| Al <sub>2</sub> Co <sub>2</sub> (7-II)     | -3.693        | -2.551        | 1.142        | -4.692        | -4.439        | 0.253        |
| Al <sub>2</sub> Co <sub>2</sub> (7-III)    | -4.039        | -3.096        | 0.943        | -4.796        | -4.263        | 0.533        |
| Al <sub>2</sub> Co <sub>2</sub> (7-IV)     | -4.041        | -3.020        | 1.021        | -4.734        | -4.206        | 0.528        |
| Al <sub>2</sub> Ni <sub>2</sub>            |               |               |              |               |               |              |
| <b>Al<sub>2</sub>Ni<sub>2</sub> (1-I)</b>  | <b>-4.456</b> | <b>-3.767</b> | <b>0.689</b> | <b>-4.456</b> | <b>-3.767</b> | <b>0.689</b> |
| Al <sub>2</sub> Ni <sub>2</sub> (1-II)*    | -3.859        | -3.244        | 0.615        | -3.859        | -3.244        | 0.615        |
| Al <sub>2</sub> Ni <sub>2</sub> (3-I)      | -4.274        | -3.045        | 1.229        | -4.390        | -3.819        | 0.571        |
| Al <sub>2</sub> Ni <sub>2</sub> (3-II)     | -4.530        | -3.097        | 1.433        | -4.689        | -4.438        | 0.251        |
| Al <sub>2</sub> Ni <sub>2</sub> (5-I)      | -3.549        | -2.426        | 1.123        | -4.539        | -4.236        | 0.303        |
| Al <sub>2</sub> Ni <sub>2</sub> (5-II)     | -3.858        | -3.013        | 0.845        | -4.494        | -4.259        | 0.235        |
| Al <sub>2</sub> Cu <sub>2</sub>            |               |               |              |               |               |              |
| <b>Al<sub>2</sub>Cu<sub>2</sub> (1-I)</b>  | <b>-4.586</b> | <b>-3.311</b> | <b>1.275</b> | <b>-4.586</b> | <b>-3.311</b> | <b>1.275</b> |
| Al <sub>2</sub> Cu <sub>2</sub> (1-II)*    | -4.182        | -3.345        | 0.838        | -4.182        | -3.345        | 0.838        |
| Al <sub>2</sub> Cu <sub>2</sub> (1-III)    | -4.165        | -3.440        | 0.725        | -4.165        | -3.440        | 0.725        |
| Al <sub>2</sub> Cu <sub>2</sub> (3-I)      | -3.603        | -2.612        | 0.992        | -5.222        | -3.268        | 1.954        |
| Al <sub>2</sub> Cu <sub>2</sub> (3-II)     | -3.650        | -2.445        | 1.205        | -5.105        | -4.204        | 0.901        |
| Al <sub>2</sub> Cu <sub>2</sub> (3-III)    | -4.001        | -3.023        | 0.978        | -4.954        | -3.245        | 1.709        |
| Al <sub>2</sub> Cu <sub>2</sub> (3-IV)     | -3.888        | -2.720        | 1.168        | -4.775        | -3.449        | 1.326        |
| Al <sub>2</sub> Cu <sub>2</sub> (5-I)      | -3.922        | -2.831        | 1.090        | -6.006        | -3.816        | 2.190        |
| Al <sub>2</sub> Cu <sub>2</sub> (5-II)     | -3.601        | -2.558        | 1.043        | -5.662        | -4.192        | 1.470        |
| Al <sub>2</sub> Cu <sub>2</sub> (5-III)    | -3.317        | -3.000        | 0.318        | -5.610        | -4.080        | 1.529        |
| Al <sub>2</sub> Cu <sub>2</sub> (5-IV)     | -3.673        | -3.070        | 0.602        | -5.751        | -4.984        | 0.767        |
| Al <sub>2</sub> Cu <sub>2</sub> (5-V)      | -3.377        | -2.977        | 0.400        | -5.930        | -3.598        | 2.333        |
| Al <sub>2</sub> Mn <sub>2</sub>            |               |               |              |               |               |              |
| <b>Al<sub>2</sub>Zn<sub>2</sub> (1-I)*</b> | <b>-3.718</b> | <b>-2.805</b> | <b>0.913</b> | <b>-3.718</b> | <b>-2.805</b> | <b>0.913</b> |
| Al <sub>2</sub> Zn <sub>2</sub> (1-II)     | -3.618        | -2.939        | 0.680        | -3.618        | -2.939        | 0.680        |
| Al <sub>2</sub> Zn <sub>2</sub> (1-III)    | -3.837        | -3.410        | 0.427        | -3.837        | -3.410        | 0.427        |
| Al <sub>2</sub> Zn <sub>2</sub> (1-IV)*    | -4.020        | -3.319        | 0.701        | -4.020        | -3.319        | 0.701        |
| Al <sub>2</sub> Zn <sub>2</sub> (3-I)      | -3.403        | -2.876        | 0.527        | -5.824        | -3.012        | 2.812        |
| Al <sub>2</sub> Zn <sub>2</sub> (3-II)     | -4.045        | -2.950        | 1.096        | -4.926        | -3.192        | 1.734        |
| Al <sub>2</sub> Zn <sub>2</sub> (5-I)      | -4.164        | -2.333        | 1.832        | -6.359        | -3.380        | 2.978        |
| Al <sub>2</sub> Zn <sub>2</sub> (5-II)     | -3.667        | -2.847        | 0.821        | -5.593        | -3.914        | 1.679        |
